# Supplementary material for: Integrated Whole Genome and Transcriptome Sequencing as a Framework for Pediatric and Adolescent AML Diagnosis and Risk Assessment
Source: Research Square preprint supplement (doi:10.21203/rs.3.rs-5775959/v1), 2025-01-22
Supplement: Supplementary file 1 [file d477791ba5f235c3685a767f.xlsx]

## Sheet: Table Legends
	Supplementary Tables
	Table S1. Overview of cohort showing sex, age at diagnosis, specimen information, genetic and genomic clinical tests performed, FAB classification, and results from conventional cytogenetics and FISH (Fluorescence in situ hybridization) testing (when applicable).
	Table S2. Tumor acquired pathogenic and likely pathogenic SNVs and indels identified by WGS, WES, RNA, and targeted panel NGS.
	Table S3. A) Comparison between conventional PCR-fragment analysis and WGS/WTS in the detection of FLT3-ITDs. B) Pathogenic and likely pathogenic focal (< 5 MB) copy number variants identified by WGS tumor genomic profiling.
	Table S4. Large scale copy number alterations (LS-CNV) detected by WGS tumor genomic profiling.
	Table S5. Pathogenic and likely pathogenic structural variants (SVs) identified by iWGS-WTS in the study cohort.
	Table S6. Comparison between conventional cytogenetics and WGS in the detection of chromosomal abnormalities. A) Head-to-head comparison in the detectin of SVs and LS-CNVs across 126 cases with non-complex karyotype. For the concordance findings, ‘✓’ - Straight concordance; ‘✓/x’ - Compatible findings between WGS and cKT, however, WGS further elucidated the corresponding chromosome abnormalities;…
	Table S7. Germline testing. A) Germline Reportable Gene List showing 220 genes predisposing to cancer and/or bone marrow failure (BMF) that are clinically validated for germline molecular diagnosis at SJCRH. B) Germline-origin P/LP genetic alterations identified in cancer and/or BMF predisposition genes listed in A) across the study cohort.

## Sheet: S1 - Cohort
	Supplementary Table 1. Overview of cohort showing gender, age at diagnosis, FAB-diagnosis including specimen information, results from conventional cytogenetic testing (when applicable) and performed molecular testing.												# SJPED panel, otherwise ARCHER VariantPLEX
	Clinical information / Diagnosis						Sample information			Sequencing				ConventionalCytogenetics
SampleID	FAB *tAML	initial Dx for tAML	Treatment related	Blast/Tumor % in tested specimen	Age	Sex	Specimen type tumor	Matched germline sample type	Timing	WGS	WES	WTS	TARGETED NGS	Karyotype	FISH
SJ030069	AML; M1		no	0.79	15	M	BM	Skin Bx	Diagnosis	Yes	Yes	Yes	N/A	46,XY,t(6;11)(q27;q23)[20]	nuc ish(MLLx2)(5'MLL sep 3'MLLx1)[183/200]
SJ030077	AMKL; M7		no	0.13	14mo	F	BM	PB	Diagnosis	Yes	Yes	Yes	Yes#	47,XX,+21c[20]
SJ030079	AMKL; M7		no	0.67	23mo	F	BM	PB	Diagnosis	Yes	Yes	Yes	N/A	52,XX,+6,+8,t(9;11)(p22;q23),+14,+17,+19,+22[9]/53,idem,+18[11]	nuc ish(MLLx2)(5'MLL sep 3'MLLx1)[155/200]
SJ030085	AML; M5		no	0.94	16	F	BM	PB	Diagnosis	Yes	Yes	Yes	N/A	46,XX,t(11;17)(q23;q12)[13]/47,idem,+8[5]/46,XX[2]	nuc ish(MLLx2)(5'MLL sep 3'MLLx1)[188/200]/(MLLx2)[12/200]
SJ030099	AML; M7		no	0.3	1	M	BM	PB	Diagnosis	Yes	Yes	Yes	N/A	47,XY,+21c[20]
SJ030118	AML; M5		no	0.95	15	F	BM	PB	Diagnosis	Yes	Yes	Yes	N/A	46,XX,t(9;11)(p22;q23)[14]/46,idem,del(X)(q24)[2]/46,XX[4]	nuc ish(MLLx2)(5'MLL sep 3'MLLx1)[188]/(MLLx2)[12/200]
SJ030119	AML; M2		no	0.31	5	F	BM	PB	Relapse	Yes	Yes	Yes	N/A	45,X,-X,t(8;21)(q22;q22)[18]/46,XX[2]
SJ030120	AML; M7		no	0.85	18mo	M	BM	PB	Diagnosis	Yes	Yes	Yes	N/A	48,XY,+8,+21[20]
SJ030151	AML; M2		no	0.47	4	F	BM	PB	Diagnosis	Yes	Yes	Yes	N/A	47,XX,inv(16)(p13.1q22),+22[13]/46,XX[7]
SJ030153	AML; M1		no	0.38	5	M	BM	PB	Relapse	Yes	Yes	Yes	N/A	96,XXYY,-7,+8,-9,del(9)(p22)x2,+14,+18,+19,+20,+22[cp12][12]/46,XY[8]
SJ030155	AML; M7		no	0.8	2	F	BM	Skin Bx	Diagnosis	Yes	Yes	Yes	N/A	50,XX,t(5;9;11)(q13;p22;q23),+19,+21,+21,+21[19]/46,XX[1]	nuc ish(MLLx2)(5'MLL sep 3'MLLx1)[193/200]
SJ030156	AML; M5		no	0.6	13	F	BM	PB	Diagnosis	Yes	Yes	Yes	N/A	46,XX,-7,+18[14]/46,XX[6]
SJ030163	AML; M1		no	0.9	8	M	BM	PB	Diagnosis	Yes	Yes	Yes	N/A	46,XY,t(8;21)(q22;q22)[17]/46,XY[3]
SJ030186	AML; M2		no	0.28	12	F	BM	Skin Bx	Diagnosis	Yes	Yes	Yes	N/A	46,XX[20]
SJ030195	AML; M2		no	0.36	5	F	BM	PB	Relapse	Yes	Yes	Yes	N/A	46,XX,del(5)(q22),t(8;21)(q22;q22)[20]
SJ030200	AML; M4		no	0.43	15	F	BM	PB	Diagnosis	Yes	Yes	Yes	N/A	46,XX,t(11;19)(q23;p13.1)[12]/46,XX[8]	nuc ish(MLLx2)(5'MLL sep 3'MLLx1)[158]/(MLLx2)[40/200]
SJ030208	AML; M1		no	0.79	14	M	BM	PB	Diagnosis	Yes	Yes	Yes	N/A	45,-Y,t(X;21;8)(p22.1;q22;q22)[17]/46,XY[3]
SJ030209	AML; M7		no	0.21	3mo	M	BM	PB	Diagnosis	Yes	Yes	Yes	N/A	46,XY,add(1)(p13),?t(3;22)(p21;q13),?ins(5;1)(p15;p34p13)[15]/46,XY[5]	nuc ish(RUNX1T1,RUNX1)x3(RUNX1T1 con RUNX1x1)[152]/(RUNX1T,RUNX1)x3(RUNX1T1 con RUNX1x2)[15]/(RUNX1T1,RUNX1)x2[33/200]
SJ030210	AML; M1		no	>40%	2	M	Skin	PB	Relapse (Myeloid sarcoma)	Yes	Yes	Yes	Yes	N/A	nuc ish(MLLx2)(5'MLL sep 3'MLLx1)[121/200], (D7Z1,D7S486)x1 [52/200]
SJ030231	AML; M4		no	0.44	12	F	PB	PB	Diagnosis	Yes	Yes	Yes	N/A	46,XX,inv(16)(p13.1q22)[18/20]/46,XX[2]	nuc ishCBFBx2)(5'CBFB sep 3'CBFBx1)[164/200]
SJ030233	AML; M3		no	0.83	16	F	BM	Skin Bx	Diagnosis	Yes	Yes	Yes	N/A	46,XX,t(15;17)(q22;q21)[19]/46,XX[1]	nuc ish(PML,RARA)x3(PML con RARAx2)[163/200]
SJ030286	AML; M2		no	0.49	9	M	BM	PB	Diagnosis	Yes	Yes	Yes	N/A	46,XY[20]
SJ030287	AML; M3		no	0.71	6	M	BM	Skin Bx	Diagnosis	Yes	Yes	Yes	N/A	46,XY,t(15;17)(q24;q21)[15]/46,XY[5]	nuc ish(PML,RARA)x3,(PML con RARAx2)[145/200]
SJ030297	AML; M2		no	0.44	7	M	BM	Skin Bx	Diagnosis	Yes	Yes	Yes	N/A	46,XY,del(7)(q22)[19]/46,XX[1]
SJ030320	AML; M5		no	0.84	16	F	BM	PB	Diagnosis	Yes	Yes	Yes	N/A	46,XX[20]
SJ030322	AML; M5		no	0.5	12	M	BM	Skin Bx	Diagnosis	Yes	Yes	Yes	N/A	46,XY,t(2;17)(q35;q11.2)[20]/46,XY[5]
SJ030324	AML; M5		no	0.92	18	F	BM	PB	Diagnosis	Yes	Yes	Yes	N/A	47,XX,+8,ins(10;11)(p12;q23q23)[11]/46,XX[9]	nuc ish(5'MLLx3,3'MLLx2)[53/200]
SJ030345	AML; M2		no	0.56	5	F	BM	Skin Bx	Diagnosis	Yes	Yes	Yes	N/A	46,XX,del(7)(q22q36)[16]/46,XX[4]	nuc ish(D7Z1x2,D7S486x1)[181/200]/ (D7Z1,D7S486)x1[7/200]/(D7Z1,D7S486)x2[12/200]
SJ030361	AML; M5		no	0.66	17	M	BM	Skin Bx	Diagnosis	Yes	Yes	Yes	N/A	46,XY[20]	nuc ish(MLLx2)[200]
SJ030410	AML; M0		no	0.75	14	M	BM	Skin Bx	Diagnosis	Yes	Yes	Yes	N/A	46,XY,del(1)(p35),add(5)(q32),r(7)(p14q11.2),del(9)(q13q22),add(11)(q13)[13]/46,XY[7]
SJ030416	AML; M5		no	0.8	17	M	BM	Skin Bx	Diagnosis	Yes	Yes	Yes	N/A	45,XY,+4,dic(9;17)(p11;p11.2),t(10;14)(q23;q32),del(12)(p11.2),-13[19]/46,XY[1]
SJ030430	AML; M2		no	0.72	2	M	BM	Skin Bx	Diagnosis	Yes	Yes	Yes	N/A	46,XY,inv(16)(p13.1q22)[17]/46,XX[3]
SJ030431	AML; M0*	ALL	yes	0.92	11	F	BM	Skin Bx	Relapse	Yes	Yes	Yes	N/A	46,XX[16]/46,XY[4]
SJ030440	AML; M4*	ALL	yes	0.63	4	M	BM	Skin Bx	Diagnosis	Yes	Yes	Yes	N/A	46,XY,add(6)(p25),t(9;11)(p22;q23)[19]/46,XY[1]	nuc ish(MLLx2)(5'MLL sep 3'MLLx1)[167/200]
SJ030454	AML; M2		no	0.46	5	F	BM	Skin Bx	Relapse	Yes	Yes	Yes	N/A	46,XX,t(8;21)(q22;q22)[12]/46,XX[8]
SJ030459	AML; M0		no	0.55	12	M	BM	Skin Bx	Relapse	Yes	Yes	Yes	N/A	46,X,-Y,t(10;11)(p12;q14),i(17)(q10),+19[16]/46,XX[4]
SJ030464	AML; M5		no	0.94	3	M	BM	Skin Bx	Diagnosis	Yes	Yes	Yes	N/A	46,XY,t(9;11)(p22;q23)[16]/46,XY[4]	nuc ish(MLLx2)(5'MLL sep 3'MLLx1)[142/200]
SJ030471	AML; M2		no	0.93	16	F	BM	Skin Bx	Diagnosis	Yes	Yes	Yes	N/A	45,X,-X,t(8;21)(q22;q22)[19]/46,XX[1]
SJ030509	AML; M2		no	0.41	11	F	BM	Skin Bx	Diagnosis	Yes	Yes	Yes	N/A	47,XX,+8,t(16;21)(q24;q22)[17]/46,XX[3]
SJ030510	AML; M1		no	0.74	11	F	BM	Skin Bx	Diagnosis	Yes	Yes	Yes	N/A	47,XX,+21[6/20]->47,XX,+21[6]/46,XX[14]
SJ030534	AML; M4		no	0.33	15	F	BM	Skin Bx	Diagnosis	Yes	Yes	Yes	N/A	46,XX,add(11)(q23)[7]	nuc ish(5'MLLx2,3'MLLx1)(5'MLL con 3'MLLx1)[172/200]
SJ030547	AML; M0		no	0.83	3	M	BM	Skin Bx	Diagnosis	Yes	Yes	Yes	N/A	46,XY,t(7;21)(p15;q22)[19]/46,XY[1]
SJ030560	AML; M0		no	0.81	17	M	BM	Skin Bx	Relapse	Yes	Yes	Yes	N/A	45,XY,inv(3)(q21q26.2),-7[20]
SJ030561	AML; M2		no	0.43	4	M	BM	Skin Bx	Relapse	Yes	Yes	Yes	N/A	46,XY,inv(16)(p13.1q22)[10]/46,idem,i(22)(q10)[4]/47,idem,+22 [3]/46,XY[3]
SJ030592	AML; M2		no	0.2	7	F	BM	Skin Bx	Relapse	Yes	Yes	Yes	N/A	46,XX,t(8;21)(q22;q22)[18]/46,XX[2]
SJ030601	AML; M2		no	0.2	19	F	BM	Skin Bx	Diagnosis	Yes	Yes	Yes	N/A	46,XX,t(8;21)(q22;q22)[6]/45,idem,-X[4]/46,XX[10]
SJ030612	AML; M4		no	0.23	1	F	BM	Skin Bx	Diagnosis	Yes	Yes	Yes	N/A	46,XX,der(9)t(9;16)(p22;q22),der(16)?inv(16)(p13.1q22)t(9;16)(p22;q22)[20]
SJ030617	AML; M4		no	0.49	13	F	BM	BM (MRD Negative)	Diagnosis	Yes	Yes	Yes	N/A	N/A
SJ030624	AML; M5		no	0.55	16mo	F	BM	Skin Bx	Diagnosis	Yes	Yes	Yes	N/A	46,XX,ins(10;11)(p12;q23q23)[12]/46,XX[8]	nuc ish(5'MLLx3,3'MLLx2)[125/200]
SJ030643	AML; M1		no	0.91	17	M	BM	PB	Diagnosis	Yes	Yes	Yes	N/A	N/A
SJ030669	AML; M2		no	0.6	18	M	BM	Skin Bx	Diagnosis	Yes	Yes	Yes	N/A	45,X,-Y,t(8;21)(q22;q22)[16]/46,XY[4]
SJ030683	AML; M2		no	0.74	2	F	BM	Skin Bx	Diagnosis	Yes	Yes	Yes	N/A	46,XX,inv(16)(p13.1q22)[5]/46,XX[15]
SJ030689	AML; M0		no	0.37	6	M	BM	Skin Bx	Diagnosis	Yes	Yes	Yes	N/A	46,XY,t(9;11)(p22;q23)[9]/46,XY[11]	nuc ish(MLLx2)(5'MLL sep 3'MLLx1)[87/200]
SJ030690	AML; M2		no	0.51	19	F	BM	PB	Diagnosis	Yes	Yes	Yes	N/A	47,XX,+21[11],46,XX[9]
SJ030708	AML; M0*	Ewings sarcoma	yes	0.56	23	M	BM	PB	Diagnosis	Yes	Yes	Yes	N/A	43,XY,-5,iAMP11q,add(12)(p11.2),-17,-18[11]/44,idem,+mar[3]/58,XY,+4,+6,+8,+9,+10,iAMP11q,+12,add(12)(p11.2),+13,+15,+19,+20,+20,+22[3]/46,XY[3]	nuc ish(MLLx2)[28/200]/(MLL amp)[172/200]
SJ030714	AML; M1		no	0.81	15	F	BM	Skin Bx	Relapse	Yes	Yes	Yes	N/A	46,XX,dup(2)(q11.2q21)[8]/46,XX[12]
SJ030727	AML; M1*	T-ALL	yes	0.57	18	F	BM	PB	Diagnosis	Yes	Yes	Yes	N/A	45,XX,-7[20]
SJ030773	AML; M0		no	0.7	4	F	BM	Skin Bx	Relapse	Yes	Yes	Yes	N/A	49,XX,ins(1;?)(p13;?),del(1)(p13p22),add(4)(q31),+8,add(10)(q22),+20,+21[10]/49,XX,add(1)(p12),ins(4;?)(q12;?),+8,del(8)(q13q22),+20,+21[10]
SJ030778	AML; M1		no	0.66	14	M	BM	Skin Bx	Diagnosis	Yes	Yes	Yes	N/A	45,X,-Y[20]	nuc ish(MLLx2)[200/200]
SJ030799	AML; M0*	Osteosarcoma	yes	0.6	13	M	BM	PB	Diagnosis	Yes	Yes	Yes	N/A	46,XY,add(3)(q29),del(5)(q23q34),del(7)(q22q34)[11]/46,XY[9]
SJ030852	AML; M4		no	0.6	2mo	M	BM	Skin Bx	Diagnosis	Yes	Yes	Yes	N/A	46,XY,t(8;16)(p11.2;p13.3)[17]/46,XY[3]
SJ030881	AML; M2		no	0.81	14	F	BM	PB	Diagnosis	Yes	Yes	Yes	N/A	46,X,-X,+8,t(8;21)(q22;q22)[19]/46,XX[1]
SJ030934	AML; M4		no	0.43	17	M	PB	BM (MRD Negative)	Relapse	Yes	Yes	Yes	N/A	46,XY[20]
SJ030947	AML; M2		no	0.41	17	M	BM	Skin Bx	Diagnosis	Yes	Yes	Yes	N/A	47,XY,+8[17]/46,XY[3]
SJ030987	AML; M5		no	0.89	10	F	BM	Skin Bx	Diagnosis	Yes	Yes	Yes	N/A	46,XX,ins(10;11)(p12;q23q23)[12]/46,XX[8]	nuc ish(MLLx2)(5'MLL sep 3'MLLx1)[191]/(MLLx2)[9/200]
SJ030988	AML; M0		no	0.87	16	M	BM	Skin Bx	Relapse	Yes	Yes	Yes	N/A	46,XY,t(10;11)(p12;q21)[6],46,XY[1]
SJ031022	AML; M2		no	0.47	2	F	BM	Skin Bx	Diagnosis	Yes	Yes	Yes	N/A	46,XX,t(8;21)(q22;q22)[20]
SJ031051	AML; M4		no	0.86	17	M	PB	Skin Bx	Diagnosis	Yes	Yes	Yes	N/A	46,XY,t(11;17)(q23;q12)[20]	nuc ish(MLLx2)(5'MLL sep 3'MLLx1)[199/200]
SJ031075	AML; M7		no	0.41	3	M	BM	Skin Bx	Diagnosis	Yes	Yes	Yes	N/A	48,XY,+8,+21c[13]/46,XY[7]
SJ031082	AML; M1		no	0.86	18	F	BM	Skin Bx	Relapse	Yes	Yes	Yes	N/A	47,XX,+10,t(16;21)(p11.2;q22.3)[17]/46,XX[3]
SJ031106	AML; M4		no	0.58	21	F	BM	Skin Bx	Diagnosis	Yes	Yes	Yes	N/A	47,XX,+8[2]/46,XX[18]
SJ031120	AML; M5*	Germ cell tumor	yes	0.89	17	M	PB	Skin Bx	Diagnosis	Yes	Yes	Yes	N/A	46,XY,t(9;11)(p22;q23)[8]/47,idem,+19[5]/47,idem,+8[4]/48,idem,+8,+10[3]	nuc ish(MLLx2)(5'MLL sep 3'MLLx1)[187]/(MLLx2)[13/200]
SJ031121	AML; M0		no	0.79	5mo	M	PB	Skin Bx	Diagnosis	Yes	Yes	Yes	N/A	46,XY[20]
SJ031186	AML; M2		no	0.34	5	M	BM	Skin Bx	Diagnosis	Yes	Yes	Yes	N/A	46,XY,t(8;21)(q22;q22),del(9)(q13q22)[20]
SJ031188	AML; M2		no	0.71	8	M	BM	Skin Bx	Diagnosis	Yes	Yes	Yes	N/A	46,XY,t(8;21)(q22;q22)[6]/45,idem,-Y[14]
SJ031200	AML; M2		no	0.76	12	F	BM	Skin Bx	Relapse	Yes	Yes	Yes	N/A	46,XX,t(8;21)(q22;q22)[14]/46,XX[6]
SJ031206	AML; M2*	T-Lymphoblastic lymphoma	yes	0.34	19	M	BM	Skin Bx	Diagnosis	Yes	Yes	Yes	N/A	45,XY,-7[8]/46,XY[12]
SJ031249	AML; M5		no	0.85	3	M	BM	Skin Bx	Diagnosis	Yes	Yes	Yes	N/A	46,XY,t(9;11)(p22;q23)[20]	nuc ish(MLLx2)(5'MLL sep 3'MLLx1)[190/200]/(MLLx2)[10/200]
SJ031254	AML; M0		no	0.85	13	M	BM	PB	Diagnosis	Yes	Yes	Yes	N/A	N/A
SJ031259	AML; M4		no	0.7	1	M	BM	Skin Bx	Diagnosis	Yes	Yes	Yes	N/A	46,XY,der(16)inv(16)(p13.1q22)t(16;21)(q22;q22.3),der(21)t(16;21)(q22;q22.3)[14]/46,idem,t(4;9)(q12;q33)[4]/46,XY[2]
SJ031272	AML; M1		no	0.94	20mo	M	BM	Skin Bx	Diagnosis	Yes	Yes	Yes	N/A	46,XY[20]
SJ031300	AML; M7		no	0.55	4	M	BM	Skin Bx	Diagnosis	Yes	Yes	Yes	N/A	48,XY,+8,t(10;11)(p12;q23),+21[19]/46,XY[1]	nuc ish(MLLx2)(5'MLL sep 3'MLLx1)[177/200]
SJ031302	AML; M1		no	0.57	15	F	PB	Skin Bx	Diagnosis	Yes	Yes	Yes	N/A	46,XX,t(16;16)(p13.1;q22)[18]/46,XX[2]	nuc ish(CBFBx2)(5'CBFB sep 3'CBFBx1)[188/200]/
SJ031311	AML; M5		no	0.92	9mo	F	BM	Skin Bx	Diagnosis	Yes	Yes	Yes	N/A	46,XX,ins(10;11)(p12;q23q22)[20]	nuc ish(MLLx2)(5'MLL sep 3'MLLx1)[151/200]/(MLLx2)[49/200]
SJ031312	AML; M2		no	0.49	10	F	BM	Skin Bx	Relapse	Yes	Yes	Yes	N/A	46,XX[20]
SJ031336	AML; M2		no	0.8	12	F	BM	Skin Bx	Diagnosis	Yes	Yes	Yes	N/A	46,XX,der(6)(6pter->6q13::8q22->8q23::21q22->21q22::8q22->8qter),der(8)(8pter->8q13::6q13->6qter),add(21)(q22.3)[17] 46,XX[3]
SJ031343	AML; M4		no	0.76	17	M	BM	Skin Bx	Relapse	Yes	Yes	Yes	N/A	46,XY,t(5;12;15)(q31;q24.1;q15)[9]/46,XY[11]
SJ031359	AML; M2		no	0.68	6	F	BM	BM (MRD Negative)	Diagnosis	Yes	Yes	Yes	N/A	48,XX,+2,?del(5)(q31q35),del(6)(q13),add(7)(p22),+mar[7]/46,XX[13]
SJ031399	AML; M5		no	0.73	8	F	PB	Skin Bx	Diagnosis	Yes	Yes	Yes	N/A	46,XX,t(6;11)(q27;q23)[20]	nuc ish(MLLx2)(5'MLL sep 3'MLLx1)[180/200]/(MLLx2)[20/200]
SJ031409	AML; M1		no	0.54	19mo	F	BM	Skin Bx	Diagnosis	Yes	Yes	Yes	N/A	46,XX,t(7;21)(p15;q22),add(20)(q13.2)[20]	nuc ish(RUNX1T1x2,RUNX1x3)[96/200]/(RUNX1T1,RUNX1)x2[104/200]
SJ031417	AML; M5		no	0.77	9	F	BM	Skin Bx	Relapse	Yes	Yes	Yes	N/A	47,XX,+8,t(11;19)(q23;p13.3)[14]/47,X,t(X;8)(p22.3;p21),+8,t(11;19)(q23;p13.3)[6]
SJ031419	AML; M4*	Astrocytoma	yes	0.44	11	F	BM	PB	Diagnosis	Yes	Yes	Yes	N/A	N/A
SJ031434	AML; M4		no	0.94	15	M	BM	Skin Bx	Diagnosis	Yes	Yes	Yes	N/A	46,XY,add(16)(p13.3),del(16)(q23)[20]
SJ031469	AML; M2		no	0.72	17	F	BM	Skin Bx	Diagnosis	Yes	Yes	Yes	Yes	46,XX,t(8;21)(q22;q22)[20]
SJ031477	AML; M7		no	0.05	11mo	F	BM	PB	Diagnosis	Yes	Yes	Yes	Yes#	47,XX,del(20)(q12),+21c[11]/46,XX[9]
SJ031527	AML; M7		no	0.9	15mo	M	BM	PB	Diagnosis	Yes	Yes	Yes	N/A	47,XY,+21c,add(21)(q22.3)[13]/47,XY,+21c[7]
SJ031528	AML; M4		no	>20%	Newborn with leukemia cutis	F	BM	Skin Bx	Diagnosis	Yes	Yes	Yes	N/A	46,XX,t(11;19)(q23;p13.1)[13]/46,XX[7]
SJ031554	AML; M4*	B-ALL	yes	0.94	9	F	BM	Skin Bx	Relapse	Yes	Yes	Yes	N/A	46,XX,t(11;19)(q23;p13.1)[20]	nuc ish(MLLx2)(5'MLL sep 3'MLLx1)[192/200]
SJ031579	AML; M1*	B-ALL	yes	0.5	12	F	BM	Skin Bx	Diagnosis	Yes	Yes	Yes	N/A	45,XX,-7[17]/46,XX[3]
SJ031601	AML; M2		no	0.45	15	M	PB	Skin Bx	Diagnosis	Yes	Yes	Yes	N/A	46,XY,del(7)(q11.1),t(8;21)(q22;q22)[12]/46,XY[1]
SJ031606	AML; M2*	Langerhans cell histiocytosis	yes	0.27	6	F	BM	BM (MRD Negative)	Diagnosis	Yes	Yes	Yes	N/A	45,XX,del(6)(q13),-7[14]/46,XX[6]
SJ031666	AML; M2		no	0.57	5	F	BM	PB	Diagnosis	Yes	Yes	Yes	N/A	N/A
SJ031686	AML; M2*	Wilms tumor	yes	0.46	6	F	BM	Skin Bx	Diagnosis	Yes	Yes	Yes	N/A	47,XX,?t(4;4)(q33;q35),+8,t(16;21)(q24.3;q22.12)[20]
SJ031719	AML; M3		no	0.95	7	F	BM	Skin Bx	Relapse	Yes	Yes	Yes	N/A	46,XX,t(3;3)(p24;q26.2),-16,+mar[13]/46,idem,del(11)(q21q23)[3]
SJ031736	AML; M7		no	0.21	22mo	M	BM	Skin Bx	Diagnosis	Yes	Yes	Yes	N/A	46,XY,t(2;12)(q?23;p13),t(7;8)(p15;p23),t(7;13)(q?36;q14)[12]/46,idem,del(3)(q21)[3]/48,idem,+6,+21[2]/46,XY[3]
SJ031737	AML; M5		no	0.91	8	M	BM	PB	Diagnosis	Yes	Yes	Yes	N/A	N/A
SJ031759	AML; M5		no	0.95	11	F	BM	PB	Diagnosis	Yes	Yes	Yes	N/A	N/A
SJ031760	AML; M2		no	0.61	12	M	BM	Skin Bx	Diagnosis	Yes	Yes	Yes	N/A	45,X,-Y,t(8;21)(q22;q22)[9]/46,X,-Y,t(8;21)(q22;q22),+15[10]/46,XY[1]
SJ031769	AML; M2		no	0.43	10	M	BM	Skin Bx	Diagnosis	Yes	Yes	Yes	N/A	47,XY,+6[19]/46,XY[1]
SJ031781	AML; M0		no	0.65	14	F	BM	Skin Bx	Relapse	Yes	Yes	Yes	N/A	45,XX,inv(3)(q21q26.2),-7[20]
SJ031855	AML; M4		no	0.46	10	F	BM	Skin Bx	Diagnosis	Yes	Yes	Yes	N/A	46,XX,inv(16)(p13.1q22)[12]/47,idem,+22[6]/46,XX[2]
SJ031924	AML; M2		no	0.71	10	F	BM	Skin Bx	Diagnosis	Yes	Yes	Yes	N/A	46,XX,t(6;9)(p22;q34)[17]/46,XX[3]
SJ031974	AML; M2		no	0.75	9	F	BM	PB	Diagnosis	Yes	Yes	Yes	N/A	N/A
SJ032017	AML; M4		no	0.8	1mo	F	PB	Skin Bx	Diagnosis	Yes	Yes	Yes	Yes	46,XX,t(1;11)(q21;q23)[19]	nuc ish(MLLx2)(5'MLL sep 3'MLLx1)[193/200]
SJ032027	AML; M1		no	0.88	10	F	PB	Skin Bx	Diagnosis	Yes	Yes	Yes	Yes	46,XX[24]
SJ032052	AML; M5		no	0.71	16	M	BM	Skin Bx	Diagnosis	Yes	Yes	Yes	Yes	46,XY[20]
SJ032056	AML; M5		no	0.96	16	F	BM	PB	Diagnosis	Yes	Yes	Yes	Yes	N/A
SJ032070	AML; M1		no	0.68	16	M	BM	Skin Bx	Diagnosis	Yes	Yes	Yes	Yes	46,XY[25]
SJ032072	AML; M7		no	0.73	11mo	F	BM	PB	Diagnosis	Yes	Yes	Yes	Yes	N/A
SJ032097	AML; M4		no	0.69	14	M	PB	Skin Bx	Relapse	Yes	Yes	Yes	Yes	N/A
SJ032106	AML; M1		no	0.52	14	M	BM	Skin Bx	Relapse	Yes	Yes	Yes	Yes	46,XY[20]
SJ032127	AML; M1		no	0.37	10	M	BM	Skin Bx	Relapse	Yes	Yes	Yes	Yes	46,XY[21]
SJ032148	AML; M2		no	0.68	15	F	BM	Skin Bx	Diagnosis	Yes	Yes	Yes	Yes	46,XX,t(8;21)(q22;q22)[20]
SJ032172	AML; M1		no	0.24	17	M	BM	Skin Bx	Diagnosis	Yes	Yes	Yes	Yes	46,XY[7]
SJ032178	AML; M1		no	0.41	13	F	BM	Skin Bx	Relapse	Yes	Yes	Yes	Yes	47,XX,+10[8]/48,idem,+8[3]/49,idem,+4,+8[3]/46,XX[11]
SJ032187	AML; M2		no	0.84	20	M	BM	Skin Bx	Diagnosis	Yes	Yes	Yes	Yes	46,XY,t(4;8;21)(q21;q22;q22)[17]/46,idem,der(4)add(4)(p16)t(4;8;21)[4]/~4Nunbanded[2]/46,XY[2]	nuc ish(RUNX1T1x3,RUNX1x3)(RUNX1T1 con RUNX1x1)[67/200]/(RUNX1T1x2,RUNX1x3)(RUNX1T1 con RUNX1x1)[47/200]/(RUNX1T1x3,RUNX1x3)(RUNX1T1 con RUNX1x2)[27/200]/(RUNX1T1x3-4,RUNX1x5-6)(RUNX1T1 con RUNX1x2)[8/200]
SJ032201	AML; M2		no	9%**	13	F	BM	Skin Bx	Diagnosis (post treatment)	Yes	Yes	Yes	N/A	45,XX,der(6)t(6;21)(q13;q22),ins(11;5)(p15;q13q33),del(7)(q22),dic(17;21)(p13;p11.2),-21,+der(?)t(12;?)(p13;?)[42]/44,idem,-7,der(18)(18pter->18q23::?::7q22->7qter)[11]/46,XX[5]	nuc ish(D7Z1,D7S486)x1[157/200]/ (D7Z1x2,D7S486x1)[18/200]/(D7Z1,D7S486)x2[25/200]
SJ032210	AML; M4*	Neuroblastoma	yes	0.71	16	M	BM	Skin Bx	Diagnosis	Yes	Yes	Yes	Yes	46,XY,del(5)(q22q33),t(6;13)(q25;q12),?inv(10)(q22q26)[13]/46,XY[7]
SJ032233	AML; M4		no	0.31	10	F	BM	Skin Bx	Relapse	Yes	Yes	Yes	Yes	47,XX,inv(16)(p13.1q22),+22[11]/46,XX[9]
SJ032253	AML; M4		no	0.21	13	M	PB	Skin Bx	Diagnosis	Yes	Yes	Yes	Yes	46,XY[20]	nuc ish(CBFBx2)[199/200]
SJ032297	AML; M4		no	0.76	8	M	BM	Skin Bx	Diagnosis	Yes	Yes	Yes	N/A	N/A
SJ032319	AML; M1		no	0.79	7	F	PB	Skin Bx	Diagnosis	Yes	Yes	Yes	Yes	46,XX[20]
SJ032324	AML; M1		no	0.86	11	F	BM	Skin Bx	Diagnosis	Yes	Yes	Yes	Yes	46,XX,t(8;21)(q22;q22)[20]	nuc ish(RUNX1T1x3,RUNX1x3)(RUNX1T1 con RUNX1x2)[198/200]
SJ032325	AML; M1		no	0.95	8	F	PB	Skin Bx	Diagnosis	Yes	Yes	Yes	Yes	46,XX[20]
SJ032347	AML; M4		no	0.84	4	M	PB	Skin Bx	Diagnosis	Yes	Yes	Yes	Yes	46,XY[20]
SJ032355	AML; M4		no	0.69	17	F	BM	Skin Bx	Diagnosis	Yes	Yes	Yes	Yes	46,XX[20]
SJ032364	AML; M7		no	0.65	4	F	BM	Skin Bx	Diagnosis	Yes	Yes	Yes	Yes	48,XX,t(2;11)(q21;q22),+6,+7[11]/48,idem,-7,add(12)(p13),+22[4]/46,XX[5]
SJ032376	AML; M2		no	0.62	5	M	BM	PB	Diagnosis	N/A	Yes	Yes	N/A	N/A
SJ032377	AML; M1		no	0.72	17	M	BM	Skin Bx	Diagnosis	Yes	Yes	Yes	Yes	46,XY[20]
SJ032378	AML; M1		no	0.96	7	M	BM	Skin Bx	Diagnosis	Yes	Yes	Yes	Yes	46,XY[20]
SJ032403	AML; M2		no	0.28	11	M	BM	Skin Bx	Diagnosis	Yes	Yes	Yes	Yes	45,X,-Y,t(8;21)(q22;q22)[12]/45,idem,del(7)(q31q34)[8]
SJ032419	AML; M1		no	0.76	17	M	BM	Skin Bx	Diagnosis	Yes	Yes	Yes	Yes	46,XY[20]
SJ032424	AML; M0		no	0.15	11	F	BM	Skin Bx	Relapse	Yes	Yes	Yes	Yes#	46,XX[20]
SJ032429	AML; M4		no	0.85	14	M	BM	Skin Bx	Diagnosis	Yes	Yes	Yes	Yes	46,XY[20]
SJ032440	AML; M1		no	0.52	20	M	BM	Skin Bx	Relapse	Yes	Yes	Yes	Yes	46,XY[20]
SJ032452	AML; M4		no	0.87	14	M	BM	PB	Diagnosis	Yes	Yes	Yes	Yes	N/A
SJ032453	AML; M5		no	0.83	14mo	F	BM	Skin Bx	Diagnosis	Yes	Yes	Yes	Yes	46,XX,der(11)?t(9;11)(p22;q23),del(12)(p12),inv(16)(p13.3q23)[23]/46,XX[2]	nuc ish(5'MLLx2,3'MLLx1)(5'MLL con 3'MLLx1)[165/200] (GLIS2x2)[200/200]
SJ032480	AML; M5		no	0.86	22mo	F	PB	Skin Bx	Diagnosis	Yes	Yes	Yes	Yes	46,XX,t(10;11)(p12;q23)[20]	nuc ish(MLLx2)(5'MLL sep 3'MLLx1)[150/200]/(MLLx2)[50/200]
SJ032498	AML; M5		no	0.65	15	M	BM	PB	Diagnosis	Yes	Yes	Yes	Yes	N/A
SJ032526	AML; M2		no	0.52	18	M	BM	Skin Bx	Diagnosis	Yes	Yes	Yes	Yes	47,XY,+mar[20]
SJ032552	AML; M5		no	0.87	15	F	BM	PB	Diagnosis	Yes	Yes	Yes	Yes	N/A
SJ032598	AML; M2		no	0.63	11	M	BM	Skin Bx	Diagnosis	Yes	Yes	Yes	Yes	46,XY,t(8;21)(q22;q22)[11]/45,idem,-Y[5]/46,XY[4]
SJ032692	AML; M1		no	0.3	7	F	BM	Skin Bx	Diagnosis	Yes	Yes	Yes	Yes	46,XX,del(7)(q22q32)[17]/47,idem,+9[3]
SJ032699	AML; M2		no	0.74	3	M	BM	PB	Diagnosis	Yes	Yes	Yes	Yes	N/A
	** post treatment, initiallly 20-30% blast count observed
	# SJPED panel: https://doi.org/10.1158/1078-0432.CCR-24-1063

## Sheet: S2 - SNVs, small INDELS
Supplementary Table S2. Tumor acquired pathogenic and likely pathogenic SNVs and indels identified by WGS, WES, RNA, and targeted panel NGS.
					<5%, rescued driver event
					<5%
	SNVs and INDELs				Variant Allelic Frequency N/A - not analyzed; N/C - analyzed with panel but gene not covered
Sample ID	Gene *AML defining	Transcript	Variant Type	Effect	WGS	WES	RNA	TARGETEDDNA
SJ030690	NPM1*	NM_002520.6	FRAMESHIFT	c.870_871insTTCC; p.Arg291Phefs*9	0.242	0	0.5	N/A
SJ031312	CEBPA*	NM_004364.4	FRAMESHIFT	c.344_354del; p.Pro115Argfs*51	0.265	0	0.45	N/A
SJ030085	KRAS	NM_033360.3	MISSENSE	c.35G>A;p.Gly12Asp	0.5	0.354	0.42	N/A
SJ030099	STAG2	NM_001042749.2	SPLICE	c.819+2T>C	0.139	0.148	0.4	N/A
SJ030118	FLT3	NM_004119.2	MISSENSE	c.2027A>C;p.Asn676Thr	0.436	0.446	0.55	N/A
SJ030119	ASXL2	NM_018263.4	FRAMESHIFT	c.1280_1286delinsTCAGAGAGT;p.Ser427Phefs*4	0.4	0.093	0.26	N/A
SJ030151	KIT	NM_000222.2	IN-FRAME INDEL	c.1255_1257del;p.Asp419del	0.234	0.236	0.5	N/A
SJ030153	STAT5B	NM_012448.3	MISSENSE	c.1924A>C;p.Asn642His	0.307	0.238	0.33	N/A
SJ030153	CBL	NM_005188.3	IN-FRAME INDEL	c.1171_1172insGATGTAGAGGCC;p.Val391delinsGlyCysArgGlyLeu	0.343	0.255	0.5	N/A
SJ030153	NOTCH1	NM_017617.4	NONSENSE	c.7180C>T;p.GIn2394*	0.421	0.28	0.71	N/A
SJ030153	PHF6	NM_001015877	SPLICE	c.968+2T>G	0.7	0.492	1	N/A
SJ030155	GATA1	NM_002049.4	FRAMESHIFT	c.789del;p.Thr264Profs*28	0.271	0.151	0	N/A
SJ030156	ETV6	NM_001987.4	FRAMESHIFT	c.419_420dup;p.His141Tyrfs*69	0.208	0.221	0.5	N/A
SJ030156	PTPN11	NM_002834.4	MISSENSE	c.214G>A;p.Ala72Thr	0.458	0.25	0.46	N/A
SJ030156	NF1	NM_000267.3	FRAMESHIFT	c.2033dup;p.Ile679Aspfs*21	0.295	0.326	0.51	N/A
SJ030163	KIT	NM_000222.2	IN-FRAME INDEL	c.1252_1254del;p.Tyr418del	0.278	0.223	0	N/A
SJ030186	WT1	NM_000378.4	FRAMESHIFT	c.1141_1144dup;p.Ala382Valfs*4	0.266	0.243	0	N/A
SJ030186	RAD21	NM_006265.3	FRAMESHIFT	c.113_116dup;p.Ser39Argfs*42	0.205	0.253	0	N/A
SJ030186	FLT3	NM_004119.2	MISSENSE	c.2505T>G;p.Asp835Glu	0.323	0.296	0.54	N/A
SJ030195	KIT	NM_000222.2	MISSENSE	c.2447A>T;p.Asp816Val	0.395	0.279	0.55	N/A
SJ030195	DNM2	NM_001005360.3	FRAMESHIFT	c.208_211del;p.Ile70Cysfs*60	0.175	0.5	0.5	N/A
SJ030195	DHX15	NM_001358.2	MISSENSE	c.664C>G;p.Arg222Gly	0.532	0.5	0.55	N/A
SJ030200	CCND3	NM_001760.4	NONSENSE	c.852_853insTGA;p.Thr285ins*	0.048	0.05	0.028	N/A
SJ030200	NRAS	NM_002524.4	MISSENSE	c.38G>A;p.Gly13Asp	0.295	0.199	0.32	N/A
SJ030200	CREBBP	NM_004380.2	FRAMESHIFT	c.3295dup;p.Glu1099Glyfs*29	0.22	0.21	0.12	N/A
SJ030200	WT1	NM_000378.4	FRAMESHIFT	c.1138_1142dup;p.Ala382Glyfs*69	0.51	0.36	0.3	N/A
SJ030208	KIT	NM_000222.2	IN-FRAME INDEL	c.1255_1256delinsTTCTTAA;p.Asp419delinsPheLeuAsn	0.377	0.124	0	N/A
SJ030210	NRAS	NM_002524.4	MISSENSE	c.181C>A;p.GIn61Lys	0.581	0.497	0.37	0.42
SJ030297	BCORL1	NM_021946.4	FRAMESHIFT	c.2757_2758insGATC;p.Asn920Aspfs*22	0.432	0.487	0.5	N/A
SJ030297	KMT2C	NM_170606.2	NONSENSE	C.6415C>T;p.Arg2139*	0.829	0.807	0.86	N/A
SJ030320	IDH1	NM_005896.3	MISSENSE	c.395G>A;p.Arg132His	0.5	0.394	0.49	N/A
SJ030320	CBL	NM_005188.3	MISSENSE	c.1100A>C;p.GIn367Pro	0.914	0.802	0.95	N/A
SJ030322	PTPN11	NM_002834.4	MISSENSE	c.1530G>C;p.GIn510His	0.415	0.425	0.59	N/A
SJ030322	RAD21	NM_006265.3	NONSENSE	c.1420C>T;p.GIn474*	0.306	0.43	0.32	N/A
SJ030324	ARID1A	NM_006015.4	FRAMESHIFT	c.27dup;p.Ala10Argfs*101	0.338	0.309	0.09	N/A
SJ030324	KRAS	NM_033360.3	MISSENSE	c.351A>T;p.Lys117Asn	0.277	0.417	0.35	N/A
SJ030345	FLT3	NM_004119.2	MISSENSE	c.2039C>T;p.Ala680Val	0.28	0.371	0.32	N/A
SJ030361	KRAS	NM_033360.3	MISSENSE	c.183A>C;p.GIn61His	0.195	0.301	0.42	N/A
SJ030410	EZH2	NM_004456.4	FRAMESHIFT	c.1627_1650delinsGTAGAATIT;p.Ala544*	0.172	0.175	0.7	N/A
SJ030410	PIK3R1	NM_181523.2	FRAMESHIFT	c.219delinsGG;p.Tyr73*	0.349	0.285	0.7	N/A
SJ030410	ETV6	NM_001987.4	FRAMESHIFT	c.140_141insAGACC;p.lle48Aspfs*21	0.269	0.365	0.5	N/A
SJ030410	MYCN	NM_005378.5	MISSENSE	c.131C>T;p.Pro44Leu	0.286	0.388	0.5	N/A
SJ030410	ZFHX4	NM_024721.4	MISSENSE	c.7718C>T;p.Thr2573Met	0.425	0.393	0	N/A
SJ030410	NRAS	NM_002524.4	MISSENSE	c.38G>T;p.Gly13Val	0.371	0.408	0.33	N/A
SJ032127	NPM1*	NM_002520.6	FRAMESHIFT	c.860_863dup; p.Trp288Cysfs*12	0.15	0.16	0.23	0.08
SJ030416	SPI1	NM_001080547.1	FRAMESHIFT	c.258_259insGACGCTCCCAGAGG;p.Arg87Aspfs*105	0.49	0.21	0.17	N/A
SJ030416	WT1	NM_000378.4	FRAMESHIFT	c.1242del;p.Arg414Serfs*18	0.238	0.25	0.25	N/A
SJ030416	NIPBL	NM_133433.3	MISSENSE	c.5536G>C;p.Ala1846Pro	0.456	0.425	0.39	N/A
SJ030416	BCORL1	NM_021946.4	NONSENSE	c.4773_4774delGGinsAT;p.Met1591_Glu1592delinslle*	0.486	0.46	1	N/A
SJ030416	ETV6	NM_001987.4	FRAMESHIFT	c.1248_1249insC;p.Phe417Leufs*9	0.446	0.484	1	N/A
SJ030416	PHF6	NM_001015877	NONSENSE	c.673C>T;p.Arg225*	0.938	0.839	0.83	N/A
SJ030430	KIT	NM_000222.2	IN-FRAME INDEL	c.1252_1257del;p.Tyr418_Asp419del	0.2	0.2	0.2	N/A
SJ030431	PHF6	NM_001015877	MISSENSE	c.977G>A;p.Cys326Tyr	0.553	0.421	0.95	N/A
SJ030431	BCORL1	NM_021946.4	NONSENSE	c.2350C>T;p.Arg784*	0.489	0.45	1	N/A
SJ030431	DNM2	NM_001005360.3	MISSENSE	c.1064A>G;p.Glu355Gly	0.918	0.857	0.81	N/A
SJ030454	WT1	NM_000378.4	MISSENSE	c.1249C>G;p.Arg417Gly	0.033	0.052	0	N/A
SJ030454	WT1	NM_000378.4	NONSENSE	c.1091C>A;p.Ser364*	0.078	0.079	0.063	N/A
SJ032106	NPM1*	NM_002520.6	FRAMESHIFT	c.860_863dup; p.Trp288Cysfs*12	0.173	0.196	0.25	0.13
SJ030459	TP53	NM_000546.5	NONSENSE	c.708delinsGTATAAA; p.Tyr236delins*	0.464	0.214	0.5	N/A
SJ030459	PHF6	NM_001015877	NONSENSE	c.902_903insACCA;p.Tyr301*	0.448	0.462	0	N/A
SJ030459	JAK3	NM_000215.3	MISSENSE	c.1533G>A;p.Met511lle	0.687	0.586	0.59	N/A
SJ030459	NF1	NM_000267.3	SPLICE	c.5943G>A;p.GIn1981=	0.842	0.822	0	N/A
SJ030464	BRAF	NM_004333.4	MISSENSE	c.1406G>C;p.Gly469Ala	0.018	0.039	0.079	N/A
SJ030464	NRAS	NM_002524.4	MISSENSE	c.38G>T;p.Gly13Val	0.0731707	0.0462687	0.058296	N/A
SJ030464	KRAS	NM_033360.3	MISSENSE	c.34G>A;p.Gly12Ser	0.058	0.057	0.093	N/A
SJ030464	ASXL1	NM_015338.5	NONSENSE	c.3037_3053del;p.Ser1013*	0.151	0.083	0.2	N/A
SJ030471	SMC1A	NM_006306.3	MISSENSE	c.1756C>T;p.Arg586Trp	0	0.071	0.06	N/A
SJ030509	ARID1A	NM_006015.4	FRAMESHIFT	c.4944_4963del;p.Thr1649Glufs*42	0.226	0.25	0	N/A
SJ030509	SMC1A	NM_006306.3	FRAMESHIFT	c.449del;p.Glu150Glyfs*27	0.286	0.373	0	N/A
SJ030510	DPF2	NM_006268.4	MISSENSE	c.976G>A;p.Glu326Lys	0.17	0.25	0.17	N/A
SJ030510	GATA2	NM_001145661.1	MISSENSE	c.952G>A;p.Ala318Thr	0.467	0.304	0.81	N/A
SJ030534	GATA2	NM_001145661.1	MISSENSE	c.1114G>A;p.Ala372Thr	0.1	0.11	0.365	N/A
SJ030534	ARID5A	NM_212481.2	FRAMESHIFT	c323_324dup;p.Arg109Alafs*39	0.368	0.336	0	N/A
SJ030547	NF1	NM_000267.3	SPLICE	c.2850+1G>A	0.174	0.101	0	N/A
SJ030560	CBL	NM_005188.3	SPLICE	c.1225_1227+4del	0.08	0.021	0	N/A
SJ030560	WT1	NM_000378.4	FRAMESHIFT	c.1078_1084dup, p.Val362Aspfs*8	0.035	0.022	0	N/A
SJ030560	WT1	NM_000378.4	FRAMESHIFT	c.1090_1093dup, p.Ala365Valfs*4	0.446	0.287	0.075	N/A
SJ030560	PTPN11	NM_002834.4	MISSENSE	c.1508G>T;p.Gly503Val	0.51	0.474	0.18	N/A
SJ030561	NRAS	NM_002524.4	MISSENSE	c.38G>A;p.Gly13Asp	0.085	0.102	0.184	N/A
SJ030592	ASXL2	NM_018263.4	FRAMESHIFT	c.1772_1773insACTTCGTTITGTC;p.GIn592Leufs*20	0.154	0.1	0.2	N/A
SJ030592	HNRNPK	NM_002140.5	FRAMESHIFT	c.115_116dup;p.Asp40Leufs*19	0.184	0.116	0.15	N/A
SJ030601	WT1	NM_000378.4	NONSENSE	c.1426A>T;p.Lys476*	0.0632911	0.0546624	0.166667	N/A
SJ030601	MGA	NM_001164273.1	FRAMESHIFT	c.1764_1765delinsGTTACCOGGG;p.Thr588Serfs*14	0.192	0.115	0.26	N/A
SJ030601	SRCAP	NM_006662.3	FRAMESHIFT	c.5494_5497delinsCCCCT;p.Ala1831Profs*17	0.271	0.234	0.13	N/A
SJ030601	ZBTB7A	NM_015898.3	FRAMESHIFT	c.522dup;p.Ala175Argfs*19	0.286	0.271	0.14	N/A
SJ030612	NRAS	NM_002524.4	MISSENSE	c.181C>A;p.GIn61Lys	0.047	0.117	0.114	N/A
SJ030612	KIT	NM_000222.2	MISSENSE	c.2447A>T;p.Asp816Val	0.167	0.21	0.36	N/A
SJ030617	NRAS	NM_002524.4	MISSENSE	c.182A>G;p.Glu61Arg	0.264	0.336	0.32	N/A
SJ030617	NRAS	NM_002524.4	MISSENSE	c.181C>A;p.Glu61Lys	0.61	0.4	0.48	N/A
SJ030624	KRAS	NM_033360.3	MISSENSE	c.183A>C;p.GIn61His	0.094	0.122	0.244	N/A
SJ030643	WT1	NM_000378.4	FRAMESHIFT	c.1173_1174insAAAA;p.GIn392Lysfs*11	0.02	0.057	0.33	N/A
SJ030099	GATA1*	NM_002049.3	FRAMESHIFT	c.150_151insC; p.Ser51GInfs*17	0.0645161	0.121212	0.66242	N/A
SJ030643	GNAS	NM_000516.6	MISSENSE	c.595C-T;p.Arg199Cys	0.59	0.51	0.44	N/A
SJ030669	KIT	NM_000222.2	IN-FRAME INDEL	c.1248_1255delinsTT;p.Thr417_Asp419delinsTyr	0.098	0.003	0.01	N/A
SJ030669	ZBTB7A	NM_015898.3	MISSENSE	c.1151G>T;p.Cys384Phe	0.523	0.434	0.55	N/A
SJ030683	NRAS	NM_002524.4	MISSENSE	c.37G>C;p.Gly13Arg	0.016	0.053	0.034	N/A
SJ030683	KIT	NM_000222.2	MISSENSE	c.1535A>G;p.Asn512Ser	0.534	0.321	0.47	N/A
SJ031106	UBTF*	NM_014233.4	ITD#	c.1332_1333insGAGAGCGAGCTGACCCGCCTGCTGGCCCGAATGAAGATTGAGGGACCT, p.Met444_Trp445insGluSerGluLeuThrArgLeuLeuAlaArgMetLysIleGluGlyPro	0.21	0.13	0.18	N/A
SJ030690	NIPBL	NM_133433.3	FRAMESHIFT	c.4171del;p.Cys1391Valfs*11	0.232	0.263	0.19	N/A
SJ030690	WT1	NM_000378.4	SPLICE	c.646+1G>C	0.387	0.311	1	N/A
SJ030708	PDGFRA	NM_006206.6	MISSENSE	c.2585T>G;p.Met862Arg	0.475	0.365	0	N/A
SJ030708	NF1	NM_000267.3	NONSENSE	c.3721C>T;p.Arg1241*	0.417	0.41	0.34	N/A
SJ030714	IKZF1	NM_006060.5	MISSENSE	c.472G>A;p.Gly158Ser	0.082	0.118	0.155	N/A
SJ030727	NF1	NM_000267.3	FRAMESHIFT	c.2033deI;p.Pro678Argfs*10	0.231	0.25	0.5	N/A
SJ030727	NF1	NM_000267.3	FRAMESHIFT	c.1019_1020del;p.Ser340Cysfs*12	0.338	0.26	0.5	N/A
SJ030727	RUNX1	NM_001754.4	NONSENSE	c.861C>A;p.Tyr287*	0.5	0.454	0.34	N/A
SJ030778	IDH1	NM_005896.3	MISSENSE	c.394C>T;p.Arg132Cys	0.521	0.38	0.4	N/A
SJ030778	PHF6	NM_001015877	MISSENSE	c.860G>T;p.Gly287Val	0.903	0.948	0.95	N/A
SJ030799	IKZF1	NM_006060.5	NONSENSE	c.1371C>T;p.Arg511*	0.143	0.086	0.14	N/A
SJ032419	CEBPA*	NM_004364.4	IN-FRAME INDEL	c.910_946dup; p.Lys304_Leu315dup	0.27	0.3	0.4	0.18
SJ030799	KRAS	NM_033360.3	MISSENSE	c.35G>A;p.Gly12Asp	0.107	0.114	0.23	N/A
SJ030799	IKZF1	NM_006060.5	NONSENSE	c.1558T>C;p.*520Glnext*29	0.105	0.118	0.15	N/A
SJ030799	NF1	NM_000267.3	SPLICE	c.4111-2A>T	0.042	0.122	0.294	N/A
SJ030881	GATA2	NM_001145661.1	FRAMESHIFT	c.802_820dup;p.Pro274Argfs*14	0.204	0.095	0.05	N/A
SJ032378	NPM1*	NM_002520.6	FRAMESHIFT	c.860_863dup; p.Trp288Cysfs*12	0.32	0.3	0.33	0.2
SJ030881	CREBBP	NM_004380.2	FRAMESHIFT	c.2615delinsGGA;p.Thr872Argfs*7	0.238	0.239	0.44	N/A
SJ030934	GATA2	NM_001145661.1	MISSENSE	c.989G>T;p.Arg330Leu	0	0.048	0.08	N/A
SJ032070	UBTF*	NM_014233.4	ITD#	c.1341_1342insGAGCGAGCTGACCCGCCTGCTGGCCCGAATGTGGAACGACGACGACGACGACCT, p.Asp447_Leu448insGluArgAlaAspProProAlaGlyProAsnValGluArgArgArgArgArgPro	0.2	0.18	0.2	N/A
SJ031759	NPM1*	NM_002520.6	FRAMESHIFT	c.804_805insCGTCGCCT; p.lle269Argfs*7	0.32	0.18	0	N/A
SJ030934	KRAS	NM_033360.3	MISSENSE	c.38G>A;p.Gly13Asp	0.306	0.433	0.44	N/A
SJ030934	WT1	NM_000378.4	MISSENSE	c.1334G>T;p.Arg445Leu	0.451	0.445	1	N/A
SJ030947	RUNX1	NM_001754.4	NONSENSE	c.601C>T;p.Arg201*	0.232	0.19	0.36	N/A
SJ030947	SRSF2	NM_003016.4	MISSENSE	c.284C-A;p.Pro95His	0.222	0.233	0.22	N/A
SJ030947	BCOR	NM_017745.5	FRAMESHIFT	c.4621dup;p.Met1541Asnfs*20	0.282	0.37	0.63	N/A
SJ030947	STAG2	NM_001042749.2	NONSENSE	c.775C>T;p.Arg259*	0.526	0.453	0.49	N/A
SJ030987	BRAF	NM_004333.4	MISSENSE	c.1447A>G;p.LyS483Glu	0.082	0.082	0.047	N/A
SJ030186	NPM1*	NM_002520.6	FRAMESHIFT	c.860_863dup; p.Trp288Cysfs*12	0.276	0.192	0.316	N/A
SJ032052	NPM1*	NM_002520.6	FRAMESHIFT	c.860_863dup; p.Trp288Cysfs*12	0.36	0.33	0.61	0.23
SJ030988	EZH2	NM_004456.4	FRAMESHIFT	c.1302_1307delinsAGTGGAGTCG;p.Asn434Lysfs*9	0.366	0.301	0.4	N/A
SJ030988	PTPN11	NM_002834.4	MISSENSE	c.179G>T;p.Gly60Val	0.386	0.466	0.64	N/A
SJ031272	NPM1*	NM_002520.6	FRAMESHIFT	c.863_864insCCTG; p.Trp288Cysfs*12	0.25	0.2	0.3	N/A
SJ030988	NF1	NM_000267.3	SPLICE	c.5943+1G>C	0.964	0.9	1	N/A
SJ030988	TP53	NM_000546.5	MISSENSE	c.820G>T; p.Val274Phe	0.953	0.915	0.98	N/A
SJ031022	SF3B1	NM_012433.2	MISSENSE	c.1774G>A;p.Glu592Lys	0.507	0.402	0.38	N/A
SJ031022	RAD21	NM_006265.3	SPLICE	c.375-1G>A	0.356	0.435	0.47	N/A
SJ031022	JAK2	NM_004972.3	MISSENSE	c.1849G>T;p.Val617Phe	0.405	0.453	0.42	N/A
SJ032325	NPM1*	NM_002520.6	FRAMESHIFT	c.860_863dup; p.Trp288Cysfs*12	0.29	0.31	0.3	0.25
SJ031051	SETD2	NM_014159.6	FRAMESHIFT	c.776dup;p.Ser260llefs*2	0.268	0.276	0.55	N/A
SJ031051	NRAS	NM_002524.4	MISSENSE	c.34G>A;p.GIy12Ser	0.311	0.322	0.16	N/A
SJ031051	KRAS	NM_033360.3	MISSENSE	c.38G>A;p.Gly13Asp	0.36	0.39	0.28	N/A
SJ031051	ZRSR2	NM_005089.3	NONSENSE	c.685G>T;p.Glu229*	0.82	0.81	0.7	N/A
SJ031075	JAK1	NM_002227.3	MISSENSE	c.2347C>T;p.Leu783Phe	0.115	0.066	0.1	N/A
SJ031075	JAK1	NM_002227.3	MISSENSE	c.2107A>T;p.Ser703Cys	0.148	0.07	0.09	N/A
SJ031075	JAK3	NM_000215.3	MISSENSE	c.1718C>T;p.Ala573Val	0.0634921	0.101754	0.1875	N/A
SJ031075	STAG2	NM_001042749.2	FRAMESHIFT	c.447del;p.Glu150Lysfs*33	0.413	0.354	0.65	N/A
SJ031082	IRF8	NM_002163.3	FRAMESHIFT	c.241_247dup;p.Arg83GInfs*8	0.333	0.2	0.11	N/A
SJ031106	NF1	NM_000267.3	MISSENSE	c.2352G>C;p.Trp784Cys	0.432	0.4	0.61	N/A
SJ031120	KRAS	NM_033360.3	MISSENSE	c.38G>A;p.Gly13Asp	0.317	0.466	0.62	N/A
SJ031186	ASXL1	NM_015338.5	FRAMESHIFT	c.2254dup;p.Ala752Glyfs*22	0.314	0.35	0.4	N/A
SJ031186	NRAS	NM_002524.4	MISSENSE	c.182A>G;p.GIn61Arg	0.488	0.456	0.42	N/A
SJ031188	NF1	NM_000267.3	FRAMESHIFT	c.4221delinsGG;p.Asp1407Glufs*7	0.216	0.104	0.1	N/A
SJ031188	ZBTB7A	NM_015898.3	FRAMESHIFT	c.887_888insTTTT;p.Leu297Phefs*244	0.203	0.189	0	N/A
SJ030286	UBTF*	NM_014233.4	ITD#	c.1303_1341dup; p.Ser435_Asp447dup	0.19	0.23	0.18	N/A
SJ031200	ASXL1	NM_015338.5	FRAMESHIFT	c.1900_1922del;p.Glu635Argfs*15	0.273	0.19	0.25	N/A
SJ031200	IDH2	NM_002168.3	MISSENSE	c.419G>A;p.Arg140GIn	0.489	0.283	0.41	N/A
SJ031200	CREBBP	NM_004380.2	SPLICE	c.4561-2A>G	0.239	0.31	0.49	N/A
SJ032355	NPM1*	NM_002520.6	FRAMESHIFT	c.860_863dup; p.Trp288Cysfs*12	0.281	0.316	0.4	0.26
SJ031200	ZBTB7A	NM_015898.3	MISSENSE	c.1295A>T;p.His432Leu	0.662	0.694	0.77	N/A
SJ031206	RUNX1	NM_001754.4	MISSENSE	c.601C>G;p.Arg201Gly	0.333	0.265	0.48	N/A
SJ031206	PTPN11	NM_002834.4	MISSENSE	c.179GsT;p.Gly60Val	0.273	0.342	0.31	N/A
SJ031249	PTPN11	NM_002834.4	MISSENSE	c.214G>A;p.Ala72Thr	0.367	0.439	0.47	N/A
SJ031254	NRAS	NM_002524.4	MISSENSE	c.35G>A;p.Gly12Asp	0.426	0.433	0.37	N/A
SJ030643	CEBPA*	NM_004364.4	IN-FRAME INDEL	c.921_947dup; p.Leu315_Glu316dup	0.318	0.241	0.29	N/A
SJ031254	ETV6	NM_001987.4	MISSENSE	c.1172A>G;p.Tyr391Cys	0.463	0.495	0.52	N/A
SJ031259	KIT	NM_000222.2	IN-FRAME INDEL	c.1255_1257del;p.Asp419del	0.05	0.077	0.04	N/A
SJ031259	NRAS	NM_002524.4	MISSENSE	c.35G>A;p.Gly12Asp	0.167	0.109	0.12	N/A
SJ031259	KIT	NM_000222.2	MISSENSE	c.2446G>C;p.Asp816His	0.207	0.134	0.13	N/A
SJ031300	CTCF	NM_006565.3	FRAMESHIFT	c.610dup;p.Thr204Asnfs*26	0.389	0.26	0.25	N/A
SJ031300	PTPN11	NM_002834.4	MISSENSE	c.213T>A;p.Phe71Leu	0.365	0.338	0.45	N/A
SJ031300	WT1	NM_000378.4	NONSENSE	c.424C>T;p.GIn142*	0.352	0.384	0.65	N/A
SJ031302	KIT	NM_000222.2	IN-FRAME INDEL	c.1248_1263delinsTCTCCGTGGG;p.Thr417_Leu421delinsLeuArgGIy	0.163	0.089	0.188	N/A
SJ031769	CBFB*	NM_022845.3	INDEL	c.259_260insGGGATTCCT, p.Asp87delinsGlyAspSerTyr	0.51	0.25	0.43	N/A
SJ031311	FLT3	NM_004119.2	MISSENSE	c.2028C>A;p.Asn676Lys	0.159	0.223	0.37	N/A
SJ031312	DPF2	NM_006268.4	MISSENSE	c.1032_1038delinsGGTAGAA;p.Phe344_Asp346delinsLeuValGlu	0.24	0.274	0.45	N/A
SJ031336	KIT	NM_000222.2	IN-FRAME INDEL	c.1594_1595insAGGGGGGCTGGGGAG;p.Ile531_Val532insGluGlyGlyTrpGly	0.058	0.037	0.276	N/A
SJ031336	KDM6A	NM_021140.3	FRAMESHIFT	c.3332_3333delinsGGTGTAGGGGAGG;p.Val1112Cysfs*12	0.275	0.218	0.44	N/A
SJ031336	ZBTB7A	NM_015898.3	FRAMESHIFT	c.437_443delinsGGA;p.Val146Glyfs*23	0.316	0.319	0.95	N/A
SJ031336	IKZF1	NM_006060.5	MISSENSE	c.324C>T;p.Arg162Trp	0.377	0.406	0.28	N/A
SJ032429	NPM1*	NM_002520.6	FRAMESHIFT	c.860_863dup; p.Trp288Cysfs*12	0.32	0.37	0.27	0.27
SJ031336	SETD1A	NM_014712.1	MISSENSE	c.4609C>T;p.Arg1537Trp	0.333	0.489	0.54	N/A
SJ031343	KRAS	NM_033360.3	MISSENSE	c.351A>C;p.Lys117Asn	0.163	0.11	0.15	N/A
SJ031343	NF1	NM_000267.3	SPLICE	c.205-3_205-2delinsATGAAGGCC;p.lle70Glufs*17	0.225	0.122	1	N/A
SJ031343	NRAS	NM_002524.4	MISSENSE	c.181C>A;p.GIn61Lys	0.143	0.132	0.13	N/A
SJ031343	U2AF1	NM_ 006758.2	MISSENSE	c.101C>A;p.Ser34Tyr	0.615	0.455	0.52	N/A
SJ031343	STAG2	NM_001042749.2	FRAMESHIFT	c.2877del;p.Phe959Leufs*6	0.871	0.837	0.85	N/A
SJ032440	CEBPA*	NM_004364.4	IN-FRAME INDEL	c.937_939dup; p.Lys313dup	0.24	0.26	0.3	0.28
SJ031343	BCORL1	NM_021946.4	FRAMESHIFT	c.1429_1430insAA;p.Thr477Lysfs*19	0.944	0.877	1	N/A
SJ031343	BCOR	NM_017745.5	FRAMESHIFT	c.2666_2667del;p.Lys889Arafs*27	0.948	0.906	0.98	N/A
SJ031359	SF3B1	NM_012433.2	MISSENSE	c.1873C>T;p.Arg625Cys	0.268	0.271	0.21	N/A
SJ031359	BRAF	NM_004333.4	MISSENSE	c.1801A>G;p.Lys601Glu	0.277	0.315	0.59	N/A
SJ032178	CEBPA*	NM_004364.4	FRAMESHIFT	c.68dup, p.His24Alafs*84	0.35	0.37	0.97	0.28
SJ031359	TET2	NM_001127208.2	NONSENSE	c.3646C>T;p.Arg1216*	0.342	0.359	0.23	N/A
SJ031312	CEBPA*	NM_004364.4	IN-FRAME INDEL	c.937_939dup; p.Lys313dup	0.277	0.275	0.18	N/A
SJ031359	CIC	NM_015125.3	MISSENSE	c.604C>T;p.Arg202Trp	0.233	0.364	0.36	N/A
SJ031399	KRAS	NM_033360.3	MISSENSE	c.38G>A;p.Gly13Asp	0.031	0.056	0.03	N/A
SJ031399	KRAS	NM_033360.3	MISSENSE	c.35G>C;p.Gly12Ala	0.281	0.34	0.21	N/A
SJ031409	CSF1R	NM_005211.3	IN-FRAME INDEL	c.1650_1664del;p.Trp550_Ser555delinsCys	0.132	0.076	0.667	N/A
SJ032210	NPM1*	NM_002520.6	FRAMESHIFT	c.860_863dup; p.Trp288Cysfs*12	0.29	0.26	0.31	0.31
SJ031417	FLT3	NM_004119.2	MISSENSE	c.17807>A;p.Phe594lle	0.0576923	0.0689655	0.0792254	N/A
SJ031417	FLT3	NM_004119.2	MISSENSE	c.1471G>A;p.Val491Leu	0.208	0.304	0.34	N/A
SJ031419	BCORL1	NM_021946.4	FRAMESHIFT	c.1428_1429insCGGG;p.Thr477Argfs*59	0.115	0.09	0.2	N/A
SJ031419	PTPN11	NM_002834.4	MISSENSE	c.227A>G;p.Glu76Gly	0.338	0.389	0.3	N/A
SJ030320	NPM1*	NM_002520.6	FRAMESHIFT	c.860_863dup; p.Trp288Cysfs*12	0.29	0.29	0.4	N/A
SJ032172	NPM1*	NM_002520.6	FRAMESHIFT	c.860_863dup; p.Trp288Cysfs*12	0.34	0.29	0.5	0.33
SJ031419	RUNX1	NM_001754.4	SPLICE	c.351+2T>A	0.568	0.545	0.5	N/A
SJ031469	GIGYF2	NM_001103147.1	IN-FRAME INDEL	c.2373_2375dup;p.Arg792dup	0.232	0.235	0.23	N/C
SJ031469	ZBTB7A	NM_015898.3	FRAMESHIFT	c.522dup;p.Ala175Argfs*19	0.444	0.466	0.41	N/C
SJ031554	FLT3	NM_004119.2	MISSENSE	c.2505T>A;p.Asp835Glu	0.211	0.166	0.25	N/A
SJ031554	FLT3	NM_004119.2	MISSENSE	c.2503G>C;p.Asp835His	0.24	0.25	0.25	N/A
SJ031554	SMC1A	NM_006306.3	MISSENSE	c.623G>C;p.Arg208Pro	0.402	0.397	0.36	N/A
SJ031554	CCND3	NM_001760.4	NONSENSE	c.778C>T;p.GIn260*	0.417	0.445	0.46	N/A
SJ031554	ASXL2	NM_018263.4	NONSENSE	c.1297G>T;p.Glu433*	0.531	0.525	0.32	N/A
SJ031579	PTPN11	NM_002834.4	MISSENSE	c.1504T>C;p.Ser502Pro	0.032	0.02	0.06	N/A
SJ031579	PTPN11	NM_002834.4	SPLICE	c.854T>C;p.Phe285Ser	0.016	0.044	0.028	N/A
SJ031579	EZH2	NM_004456.4	FRAMESHIFT	c.1184dup;p.Glu396Argfs*4	0.208	0.074	0.13	N/A
SJ031579	PTPN11	NM_002834.4	MISSENSE	c.211T>C;p.Phe71Leu	0.053	0.08	0.068	N/A
SJ030643	CEBPA*	NM_004364.4	FRAMESHIFT	c.321dupCT; p.Tyr108Serfs*53	0.29	0.31	0.33	N/A
SJ031579	GATA2	NM_001145661.1	IN-FRAME INDEL	c.345_350delinsTTCTCCAAGACGCCACTCTTCTCCTTCCTGTTCTCCTTCTC;p.Trp116_Thr117delinsSerProArgArgHisPhePheSerPheLeuPheSerPheSer	0.34	0.11	0.77	N/A
SJ032419	CEBPA*	NM_004364.4	NONSENSE	c.274A>T; p.Lys92*	0.49	0.43	0.62	0.42
SJ031579	EZH2	NM_004456.4	SPLICE	c.1547-1G>A	0.433	0.408	0.41	N/A
SJ031579	PMS2	NM_000535.6	NONSENSE	c.809C>G;p.Ser270*	0.5	0.433	0.26	N/A
SJ031601	KIT	NM_000222.2	IN-FRAME INDEL	c.1256_1264delinsTTAATCCTC;p.Asp419_Val422delinsValAsnProLeu	0.384	0.13	0.43	N/A
SJ031601	FANCM	NM_020937.3	NONSENSE	c.5791C>T;p.Arg1931*	0.52	0.46	0.88	N/A
SJ031606	KRAS	NM_033360.3	MISSENSE	c.179G>A;p.Gly60Asp	0.035	0.048	0.073	N/A
SJ031606	EZH2	NM_004456.4	FRAMESHIFT	c.2219_2232dup;p.Glu745Serfs*27	0.714	0.4	0.4	N/A
SJ031606	BRAF	NM_004333.4	MISSENSE	c.1799T>A;p.Val600Glu	0.5	0.579	0.51	N/A
SJ031666	JAK1	NM_002227.3	MISSENSE	c.2689G>A;p.Glu897Lys	0.05	0.055	0.03	N/A
SJ031666	HERC2	NM_004667.5	NONSENSE	c.10826_10828del;p.Ser3609_GIn3610delins*	0.426	0.43	0.22	N/A
SJ031686	NRAS	NM_002524.4	MISSENSE	c.35G>A;p.Gly12Asp	0.044	0.055	0.08	N/A
SJ031686	KRAS	NM_033360.3	MISSENSE	c.35G>C;p.Gly12Ala	0.383	0.253	0.38	N/A
SJ031719	BCOR	NM_017745.5	MISSENSE	C.4274A>G;p.Asn1425Ser	0.521	0.392	0.96	N/A
SJ031736	RB1	NM_000321.2	FRAMESHIFT	c.2567_2570dup;p.Val858Profs*8	0.086	0.113	0.067	N/A
SJ031737	NRAS	NM_002524.4	MISSENSE	c.35G>A;p.Gly12Asp	0.103	0.06	0.09	N/A
SJ031737	KRAS	NM_033360.3	MISSENSE	c.38_39delinsTT;p.Gly13Val	0.095	0.115	0.154	N/A
SJ031759	PTPN11	NM_002834.4	MISSENSE	c.226G>C;p.Glu76GIn	0.034	0.039	0.143	N/A
SJ032440	CEBPA*	NM_004364.4	FRAMESHIFT	c.332_339del; p.Ala111Glyfs*56	0.27	0.29	0.17	0.44
SJ031759	GATA2	NM_001145661.1	SPLICE	c.1144-1G>A	0.532	0.384	0.86	N/A
SJ031760	IKZF1	NM_006060.5	MISSENSE	c.551G>A;p.Arg184GIn	0.082	0.092	0.095	N/A
SJ032319	CEBPA*	NM_004364.4	FRAMESHIFT	c.68dup, p.His24Alafs*84	0.4	0.3	0.53	0.44
SJ031760	FBXW7	NM_033632.3	MISSENSE	c.1394G>A;p.Arg465His	0.189	0.108	0.15	N/A
SJ031760	FBXO11	NM_025133.4	NONSENSE	c.640G>T;p.Glu214*	0.098	0.149	0.077	N/A
SJ032347	CEBPA*	NM_004364.4	FRAMESHIFT	c.287del; p.Gly96Alafs*64	0.21	0.26	0.58	0.45
SJ031760	KIT	NM_000222.2	MISSENSE	c.2446G>T;p.Asp816Tyr	0.213	0.152	0.2	N/A
SJ031760	KIT	NM_000222.2	IN-FRAME INDEL	c.1251_1256delinsGGG;p.Tyr418_Asp419delinsGly	0.345	0.29	0.32	N/A
SJ031769	NRAS	NM_002524.4	MISSENSE	c.182A>G;p.GIn61Arg	0.122	0.063	0.07	N/A
SJ031769	FLT3	NM_004119.2	IN-FRAME INDEL	c.2508_2510del;p.Ile836del	0.0833333	0.0675105	0.105315	N/A
SJ031769	NRAS	NM_002524.4	MISSENSE	c.35G>A;p.Gly12Asp	0.188	0.131	0.15	N/A
SJ031769	NRAS	NM_002524.4	MISSENSE	c.34G>A;p.Gly12Ser	0.12	0.17	0.16	N/A
SJ031781	NRAS	NM_002524.4	MISSENSE	c.35G>A;p.Gly12Asp	0.393	0.44	0.77	N/A
SJ030322	NPM1*	NM_002520.6	FRAMESHIFT	c.860_863dup; p.Trp288Cysfs*12	0.3	0.36	0.3	N/A
SJ031855	NRAS	NM_002524.4	MISSENSE	c.35G>C;p.Gly12Ala	0.256	0.254	0.67	N/A
SJ031924	NRAS	NM_002524.4	MISSENSE	c.35G>A;p.Gly12Asp	0.035	0.063	0.062	N/A
SJ031924	WT1	NM_000378.4	FRAMESHIFT	c.1053dup;p.Arg352Glufs*16	0.15	0.206	0.16	N/A
SJ031924	PTPN11	NM_002834.4	MISSENSE	c.922A>G;p.Asn308Asp	0.439	0.319	0.47	N/A
SJ031924	IDH2	NM_002168.3	MISSENSE	c.419G>A;p.Arg140GIn	0.542	0.465	0.48	N/A
SJ031974	DHX15	NM_001358.2	MISSENSE	c.664C>G;p.Arg222Gly	0.267	0.168	0.26	N/A
SJ031974	MGA	NM_001164273.1	FRAMESHIFT	c.1143_1144insC;p.Lys382Ginfs*7	0.211	0.182	0.33	N/A
SJ031974	ASXL1	NM_015338.5	FRAMESHIFT	c.1934dup;p.Gly646Trpfs*12	0.247	0.183	0.19	N/A
SJ031974	ZBTB7A	NM_015898.3	NONSENSE	c.1352_1353insGGGT;p.Tyr451*	0.147	0.205	0.16	N/A
SJ031974	AXIN2	NM_004655.3	NONSENSE	c.1966C>T;p.Arg656*	0.184	0.216	0	N/A
SJ032347	CEBPA*	NM_004364.4	IN-FRAME INDEL	c.925_927dup; p.Glu309dup	0.32	0.39	0.27	0.46
SJ030510	CEBPA*	NM_004364.4	IN-FRAME INDEL	c.934_936dup; p.GIn312dup	0.28	0.374	0.33	N/A
SJ031974	IDH2	NM_002168.3	MISSENSE	c.418C>T;p.Arg140Trp	0.167	0.226	0.23	N/A
SJ032017	ASXL2	NM_018263.4	FRAMESHIFT	c.2653_2656del;p.Ser885Leufs*2	0.352	0.206	0.3	N/C
SJ032027	WT1	NM_000378.4	FRAMESHIFT	c.1090_1091insTTTCC;p.Ser364Phefs*70	0.243	0.335	0.28	0.43
SJ032052	PTPN11	NM_002834.4	MISSENSE	c.226G>A;p.Glu76Lys	0.402	0.447	0.58	0.43
SJ032056	RUNX1	NM_001754.4	FRAMESHIFT	c.904_907dup;p.Ser303Tyrfs*298	0.247	0.374	0.4	0.46
SJ032056	FLT3	NM_004119.2	MISSENSE	c.2503G>T;p.Asp835Tyr	0.429	0.498	0.46	0.46
SJ032056	WT1	NM_000378.4	MISSENSE	c.1333C>T;p.Arg445Trp	0.417	0.449	0.35	0.47
SJ032070	WT1	NM_000378.4	FRAMESHIFT	c.1080_1087dup;p.Arg363Leufs*72	0.275	0.209	0.45	0.15
SJ032072	NRAS	NM_002524.4	MISSENSE	c.182A>G;p.GIn61Arg	0.127	0.111	0.21	0.13
SJ032097	WT1	NM_000378.4	FRAMESHIFT	c.1086_1090del;p.Arg363Glyfs*3	0.34	0.299	0.71	0.51
SJ032106	ZFP36L2	NM_006887.4	MISSENSE	c.611G>A;p.Gly204Asp	0.04	0.025	0.048	N/C
SJ032106	IDH1	NM_005896.3	MISSENSE	c.394C>T;p.Arg132Cys	0.359	0.267	0.42	0.26
SJ032148	ZBTB7A	NM_015898.3	MISSENSE	c.355G>A;p.Val119Met	0.847	0.791	0.96	N/C
SJ031075	GATA1*	NM_002049.3	FRAMESHIFT	c.90_91del; p.Val32Phefs*7	0.392	0.4	0.95	N/A
SJ030934	CEBPA*	NM_004364.4	FRAMESHIFT	c.68_78del; p.Pro23GInfs*81	0.4	0.4	0.4	N/A
SJ032172	NRAS	NM_002524.4	MISSENSE	c.182A>G;p.GIn61Arg	0.119	0.087	0.039	0.07
SJ032172	NRAS	NM_002524.4	MISSENSE	c.183A>T;p.GIn61His	0.235	0.275	0.02	0.26
SJ032172	CEBPA	NM_004364.4	FRAMESHIFT	c.333_334dup;p.Pro112Argfs*49	0.333	0.31	0.66	0.48
SJ032178	RUNX1	NM_001754.4	FRAMESHIFT	c.856_859dup;p.Tyr287Serfs*314	0.193	0.177	0.38	0.25
SJ032187	KIT	NM_000222.2	MISSENSE	c.2447A>T;p.Asp816Val	0.43	0.394	0.51	0.25
SJ032210	PTPN11	NM_002834.4	MISSENSE	c.188A>G;p.Tyr63Cys	0.505	0.453	0.52	0.41
SJ032233	FLT3	NM_004119.2	MISSENSE	c.1471G>T;p.Val491Leu	0.284	0.283	0.45	0.43
SJ032253	NRAS	NM_002524.4	MISSENSE	c.181C>A;p.GIn61Lys	0.466	0.346	0.43	0.27
SJ032297	JAK1	NM_002227.3	MISSENSE	c.2689G>A;p.Glu897Lys	0.554	0.467	0.54	N/A
SJ032319	JAK3	NM_000215.3	MISSENSE	c.1970G>A;p.Arg657GIn	0.037	0.028	0.024	0.03
SJ032319	KRAS	NM_033360.3	MISSENSE	c.35G>A;p.Gly12Asp	0.25	0.341	0.46	0.34
SJ032319	IKZF1	NM_006060.5	MISSENSE	c.472G>A;p.Gly158Ser	0.543	0.494	0.46	0.45
SJ032319	GATA2	NM_001145661.1	MISSENSE	c.962T>A;p.Leu321His	0.452	0.46	0.8	0.46
SJ032324	WT1	NM_000378.4	FRAMESHIFT	c.1086dup;p.Arg363Thrfs*5	0.044	0.029	0	~3.0%
SJ032324	ASXL2	NM_018263.4	FRAMESHIFT	c.3558delinsGCC;p.Gly1187Profs*10	0.355	0.344	0.34	0.42
SJ032324	ZBTB7A	NM_015898.3	NONSENSE	c.1329C>A;p.Cys443*	0.353	0.326	0.28	N/C
SJ032324	FLT3	NM_004119.2	MISSENSE	c.2503G>T;p.Asp835Tyr	0.25	0.465	0.46	0.45
SJ032324	MGA	NM_001164273.1	FRAMESHIFT	c.1182_1183insCACC;p.Glu395Hisfs*16	0.375	0.353	0.25	N/C
SJ032324	KDM6A	NM_021140.3	FRAMESHIFT	c.3335_3340delinsCCCGGGAG;p.Val1112Alafs*9	0.298	0.274	0.43	0.48
SJ032319	CEBPA*	NM_004364.4	MISSENSE	c.890G>C; p.Arg297Pro	0.53	0.43	0.48	0.48
SJ032324	MYC	NM_002467.4	MISSENSE	c.221C>T;p.Pro74Leu	0.429	0.402	0.8	0.49
SJ032325	NRAS	NM_002524.4	MISSENSE	c.34G>A;p.Gly12Ser	0.338	0.418	0.48	0.43
SJ032325	GATA2	NM_001145661.1	IN-FRAME INDEL	c.1095_1096insCCC;p.Asn365_Gly366insPro	0.345	0.337	0.39	0.49
SJ032347	WT1	NM_000378.4	FRAMESHIFT	c.973_974insTTTT;p.Asp325Valfs*3	0.289	0.35	1	0.44
SJ032355	PTPN11	NM_002834.4	MISSENSE	c.215C>T;p.Ala72Val	0.078	0.071	0.08	0.07
SJ032355	NRAS	NM_002524.4	MISSENSE	c.35G>A;p.Gly12Asp	0.232	0.226	0.37	0.27
SJ032364	CSF1R	NM_005211.3	IN-FRAME INDEL	c.1630_1653del;p.Pro544_Lys551del	0.107	0.067	0.01	N/C
SJ032364	KRAS	NM_033360.3	MISSENSE	c.175G>A;p.Ala59Thr	0.16	0.155	0.19	0.14
SJ032364	TET2	NM_001127208.2	MISSENSE	c.5618T>C;p.Ile1873Thr	0.286	0.234	0.2	0.17
SJ032364	NRAS	NM_002524.4	MISSENSE	c.181C>A;p.GIn61Lys	0.21	0.159	0.19	0.18
SJ032376	NRAS	NM_002524.4	MISSENSE	c.38G>A;p.Gly13Asp	N/A	0.129	0.08	N/A
SJ032376	KIT	NM_000222.2	MISSENSE	c.2466T>G;p.Asn822Lys	N/A	0.248	0.38	N/A
SJ032376	SPI1	NM_001080547.1	FRAMESHIFT	c.286delinsCCC;p.Val96Profs*92	N/A	0.406	0.4	N/C
SJ032376	ZBTB7A	NM_015898.3	MISSENSE	c.74A>G;p.Asn25Ser	N/A	0.418	0.41	N/C
SJ032377	WT1	NM_000378.4	NONSENSE	c.1291_1295dup;p.Pro433*	0.833	0.85	0.4	0.66
SJ032378	TET2	NM_001127208.2	NONSENSE	c.4210C>T;p.Arg1404*	0.419	0.324	0.39	0.43
SJ032378	TET2	NM_001127208.2	FRAMESHIFT	c.3732_3733del;p.Tyr1245Leufs*22	0.425	0.343	0.41	0.54
SJ032403	KIT	NM_000222.2	MISSENSE	c.2466T>G;p.Asn822Lys	0.057	0.031	0	0.03
SJ032403	KIT	NM_000222.2	IN-FRAME INDEL	c.1723_1724insCCC;p.Thr574GIn575insPro	0.0617284	0.0494881	0.056338	0.04
SJ032403	FLT3	NM_004119.2	MISSENSE	c.2504A>T;p.Asp835Val	0.0641026	0.0575758	0.0625	0.05
SJ032403	KRAS	NM_033360.3	MISSENSE	c.35G>A;p.Gly12Asp	0.015	0.069	0.15	0.06	0.118855
SJ032403	NRAS	NM_002524.4	MISSENSE	c.35G>A;p.Gly12Asp	0.037	0.08	0.132	0.07
SJ032424 #	NPM1*	NM_002520.6	FRAMESHIFT	c.860_863dup; p.Trp288Cysfs*12	0.031	0.042	0.269	0.4% #
SJ032403	ZFP36L2	NM_006887.4	FRAMESHIFT	c.401_404delinsAG;p.Leu134GInfs*339	0.039	0.06	0.106	N/C
SJ032403	ASXL2	NM_018263.4	FRAMESHIFT	c.3857_3858insT;p.Glu1287Argfs*42	0.179	0.183	0.27	N/C
SJ032419	CSF3R	NM_000760.3	MISSENSE	c.1919C>A;p.Thr640Asn	0.033	0.051	0.17	0.08
SJ031477 #	GATA1*	NM_002049.3	FRAMESHIFT	c.150_160delinsT; p.Ser51Profs*83	0.028	0.013	0.503	1% #
SJ032419	KMT2C	NM_170606.2	NONSENSE	c.7186C>T;p.GIn2396*	0.108	0.062	0.08	N/C
SJ032419	NRAS	NM_002524.4	MISSENSE	c.35G>A;p.Gly12Asp	0.17	0.173	0.17	0.18
SJ032419	GATA2	NM_001145661.1	MISSENSE	c.961C>T;p.Leu321Phe	0.241	0.232	0.25	0.18
SJ032419	FBXW7	NM_033632.3	MISSENSE	c.1513C>T;p.Arg505Cys	0.27	0.207	0.13	0.21
SJ032424 #	WT1	NM_000378.4	FRAMESHIFT	c.1082_1088dup;p.Ser364Cysfs*6	0.056	0.022	0.455	10.7% #
SJ030934	CEBPA*	NM_004364.4	MISSENSE	c.935A>C; p.GIn312Pro	0.45	0.474	0.43	N/A
SJ032424 #	WT1	NM_000378.4	FRAMESHIFT	c.1087delinsGA;p.Arg363Glufs*5	0.052	0.061	0.443	8.3% #
SJ032424 #	FLT3	NM_004119.2	MISSENSE	c.2503G>T;p.Asp835Tyr	0.079	0.082	0.427	8.5% #
SJ032429	WT1	NM_000378.4	MISSENSE	c.1333C>T;p.Arg445Trp	0.016	0.02	0.04	0.03
SJ032429	KIT	NM_000222.2	MISSENSE	c.2447A>T;p.Asp816Val	0.4	0.44	0.71	0.46
SJ032440	EP300	NM_001429.3	MISSENSE	c.3602G>T;p.Cys1201Phe	0.295	0.218	0.29	N/C
SJ032440	DPF2	NM_006268.4	MISSENSE	c.892T>A;p.Cys298Ser	0.28	0.22	0.43	N/C
SJ032440	EZH2	NM_004456.4	FRAMESHIFT	c.2206_2227delinsTCGAA;p.Ala736Serfs*21	0.169	0.016	0.15	0.28
SJ032452	KIT	NM_000222.2	IN-FRAME INDEL	c.1250_1257delinsTT;p.Thr417_Asp419delinslle	0.227	0.213	0.37	0.46
SJ032480	SETD2	NM_014159.6	SPLICE	c.6059_6060+4del	0.279	0.279	0.8	N/C
SJ032480	PTPN11	NM_002834.4	MISSENSE	c.227A>C;p.Glu76Ala	0.492	0.407	0.44	0.4
SJ032498	ARID1A	NM_006015.4	FRAMESHIFT	c.1113dup;p.GIn372Alafs*28	0.172	0.224	0.17	N/C
SJ032526	WT1	NM_000378.4	FRAMESHIFT	c.1086_1087insTG;p.Arg363Cysfs*70	0.014	0.018	0.029	0.07
SJ032526	WT1	NM_000378.4	FRAMESHIFT	c.1089dup;p.Ser364Valfs*4	0.085	0.098	0.015	0.07
SJ032526	CSF3R	NM_000760.3	FRAMESHIFT	c.2347_2350dup;p.Pro784GInfs*6	0.156	0.148	0.19	0.14
SJ032526	STAT5B	NM_012448.3	MISSENSE	c.1924A>C;p.Asn642His	0.107	0.182	0.13	N/C
SJ032552	KRAS	NM_033360.3	MISSENSE	c.38G>A;p.Gly13Asp	0.308	0.261	0.25	0.27
SJ032552	SETD2	NM_014159.6	NONSENSE	c.208C>T;p.Arg70*	0.25	0.275	0.28	N/C
SJ030708	TP53* w/aneuplidy	NM_000546.5	MISSENSE	c.743G>A; p.Arg248GIn	0.57	0.75	0.99	N/A
SJ032552	SETD2	NM_014159.6	NONSENSE	c.4973C>G;p.Ser1658*	0.343	0.36	0.21	N/C
SJ030416	TP53* w/aneuplidy	NM_000546.5	MISSENSE	c.841G>C; p.Asp281His	0.75	0.8	0.9	N/A
SJ032598	FBXO11	NM_025133.4	FRAMESHIFT	c.146delinsCC;p.Arg49Profs*20	0.08	0.055	0.101	N/C
SJ032598	SETD2	NM_014159.6	FRAMESHIFT	c.7541_7542insGGGGGCCA;p.His2514GInfs*7	0.27	0.098	0.19	N/C
SJ032598	ZBTB7A	NM_015898.3	MISSENSE	c.149C>T;p.Ser50Leu	0.19	0.17	0.13	N/C
SJ032598	MGA	NM_001164273.1	NONSENSE	c.2193del;p.Leu732*	0.227	0.266	0.38	N/C
SJ032598	JAK2	NM_004972.3	MISSENSE	c.2600G>A;p.Arg867GIn	0.274	0.321	0.44	0.32
SJ032598	CSF3R	NM_000760.3	NONSENSE	c.2362G>T;p.Glu788*	0.323	0.375	0.43	0.34
SJ030077 #	GATA1*	NM_002049.3	FRAMESHIFT	c.154_158dup; p.Thr54GInfs*85	0.048	0.025	0.533	8.7% #
SJ032692	PTPN11	NM_002834.4	MISSENSE	c.853T>C;p.Phe285Leu	0.056	0.07	0.12	0.09
SJ030714	CEBPA*	NM_004364.4	FRAMESHIFT	c.68deI; p.Pro23Argfs*137 (In a region of LOH)	0.788	0.875	1	N/A
SJ032692	EZH2	NM_004456.4	INDEL	c.224_225ins73; p.Ser76LeufsTer30	0.21	0.24	0.25	0.1
SJ032692	KMT2C	NM_170606.2	FRAMESHIFT	c.7084_7085insG;p.Ser2362Cysfs*5	0.108	0.084	0.13	N/C
SJ032692	IDH2	NM_002168.3	MISSENSE	c.419G>A;p.Arg140GIn	0.371	0.314	0.28	0.28
SJ032692	KMT2C	NM_170606.2	FRAMESHIFT	c.13872_13874delinsCCCTTGGGTAAA;p.Leu4625delinsProTrpValLys	0.5	0.43	0.63	N/C
SJ032699	FLT3	NM_004119.2	MISSENSE	c.2028C>A;p.Asn676Lys	0.011	0.067	0.16	0.04	0.489
SJ031527	GATA1*	NM_002049.3	FRAMESHIFT	c.94_97 dup; p.Phe33Cysfs*8	0.97	0.97	1	N/A
								# Result by SJPedPanel (PMID: 39047169). All others were tested by the targeted NGS panel described in the main text of the article

## Sheet: S3A - FLT3 ITDs
Supplementary Table S3A. FLT3-ITDs
	Gene	Transcript	Variant Type	Affected region	Reading frame	Net effect	Cytoband	Coordinates	Length (bp)	Length (amino acids)	WGS	RNA	PCR	PCR ratio (ITD/WT)	Comment
SJ030186	FLT3	NM_004119.2	ITD	Exon 14	in-frame	activation	13q12.2	13:g.28608263_28608286	24	8	ø	✓	✓	0.01
SJ030233	FLT3	NM_004119.2	ITD	Exon 14	in-frame	activation	13q12.2	13:g.28608230_28608322	93	31	✓	✓	✓	0.51
SJ030286	FLT3	NM_004119.2	ITD	Exon 14	in-frame	activation	N/A	N/A	33	11	ø	ø	✓	0.02	detected by PCR only
SJ030286	FLT3	NM_004119.2	ITD	Exon 14	in-frame	activation	13q12.2	13:g.28608220-28608267	51	17	ø	✓	✓	0.03
SJ030286	FLT3	NM_004119.2	ITD	Exon 14	in-frame	activation	13q12.2	13:g.28608215-28608274	60	20	✓	✓	✓	0.05	one peak at 60bp detected by PCR
SJ030286	FLT3	NM_004119.2	ITD	Exon 14	in-frame	activation	13q12.2	13:g.28608250-28608309	60	20	ø	✓	✓	0.05	one peak at 60bp detected by PCR
SJ030286	FLT3	NM_004119.2	ITD	Exon 14	in-frame	activation	13q12.2	13:g.28608215_28608250	36	12	✓	✓	✓	0.19
SJ030287	FLT3	NM_004119.2	ITD	Exon 14	in-frame	activation	13q12.2	13:g.28608255-28608275	21	7	✓	✓	✓	0.02
SJ030287	FLT3	NM_004119.2	ITD	Exon 14	in-frame	activation	13q12.2	13:g.28608261_28608277	18	6	✓	✓	✓	0.06
SJ030297	FLT3	NM_004119.2	ITD#	Exon 14	in-frame	activation	13q12.2	13:g.28608284_28608284	9	3	✓	✓	✓	0.03
SJ030320	FLT3	NM_004119.2	ITD	Exon 14	in-frame	activation	13q12.2	13:g.28608265_28608321	57	19	✓	✓	✓	0.8
SJ030416	FLT3	NM_004119.2	ITD#	Exon 14	in-frame	activation	13q12.2	13:g.28608241_28608265	30	10	✓	✓	✓	0.01
SJ030471	FLT3	NM_004119.2	ITD#	Exon 14	in-frame	activation	13q12.2	13:g.28608258_28608302	48	16	✓	✓	✓	0.05
SJ030560	FLT3	NM_004119.2	ITD	Exon 14	in-frame	activation	13q12.2	13:g.28608251_28608302	54	18	✓	✓	✓	0.02
SJ031434	FLT3	NM_004119.2	ITD	Exon 14	in-frame	activation	13q12.2	13:g.28608259_28608300	42	14	✓	✓	✓	0.49
SJ031434	FLT3	NM_004119.2	ITD	Exon 14	in-frame	activation	13q12.2	13:g.28608254-28608280	30	10	✓	✓	✓	0.56
SJ031759	FLT3	NM_004119.2	ITD	Exon 14	in-frame	activation	13q12.2	13:g.28608252_28608302	51	17	✓	ø	✓	0.17
SJ031759	FLT3	NM_004119.2	ITD	Exons 14-15	in-frame	activation	13q12.2	13:g.28608112_28608309	198	66	✓	✓	✓	0.89
SJ031924	FLT3	NM_004119.2	ITD#	Exon 14	in-frame	activation	13q12.2	13:g.28608252_28608264	24	8	✓	✓	✓	0.01
SJ031924	FLT3	NM_004119.2	ITD#	Exon 14	in-frame	activation	13q12.2	13:g.28608231-28608314	84	28	✓	✓	✓	0.64
SJ032027	FLT3	NM_004119.2	ITD#	Exon 14	in-frame	activation	13q12.2	13:g.28608262_28608262	21	7	✓	✓	✓	0.13
SJ032070	FLT3	NM_004119.2	ITD	Exon 14	in-frame	activation	13q12.2	13:g.28608265_28608300	36	12	✓	✓	✓	0.04
SJ032097	FLT3	NM_004119.2	ITD	Exon 14	in-frame	activation	13q12.2	13:g.28608238_28608306	69	23	✓	✓	✓	0.07
SJ032172	FLT3	NM_004119.2	ITD	Exon 14	in-frame	activation	13q12.2	13:g.28608263_28608286	24	8	✓	✓	✓	0.05
SJ032172	FLT3	NM_004119.2	ITD	Exon 14	in-frame	activation	13q12.2	13:g.28608231-28608314	51	17	ø	✓	✓	0.19
SJ032172	FLT3	NM_004119.2	ITD	Exon 14	in-frame	activation	13q12.2	13:g.28608262_28608276	15	5	✓	✓	✓	0.55
SJ032172	FLT3	NM_004119.2	ITD	Exon 14	in-frame	activation	13q12.2	13:g.28608268_28608313	45	15	✓	✓	✓	1.38
SJ032347	FLT3	NM_004119.2	ITD	Exon 14	in-frame	activation	13q12.2	13:g.28608252_28608278	27	9	✓	✓	✓	0.8
SJ032378	FLT3	NM_004119.2	ITD	Exon 14	in-frame	activation	13q12.2	13:g.28608231_28608317	87	29	✓	✓	✓	0.7
Abbreviations
#	in-frame complex indel
✓	detected
ø	not detected

## Sheet: S3B - Focal CNVs
Supplementary Table S3B. Pathogenic and likely pathogenic focal (< 5 MB) copy number variants identified by WGS tumor genomic profiling.
Sample ID	Gene	Transcript	Variant Type	Affected region	Reading frame	Net effect	Cytoband	Coordinates	Length (bp)
SJ030153	CDKN2A	NM_000077.4	FOCAL DELETION	Whole gene	-	inactivation, 1 copy	9p21.3	9:g.21733996_26816238	5082242
SJ030153	CDKN2B	NM_004936.3	FOCAL DELETION	Whole gene	-	inactivation, 1 copy	9p21.3	9:g.21733996_26816238	5082242
SJ030156	NF1	NM_000267.3	FOCAL DELETION	Whole gene	-	inactivation, 1 copy	17q11.2	17:g.27635787_30492621	2856834
SJ030156	SUZ12	NM_015355.3	FOCAL DELETION	Whole gene	-	inactivation, 1 copy	17q11.2	17:g.27635787_30492621	2856834
SJ030231	CBL	NM_005188.3	FOCAL DELETION	Exons 8-9	in-frame	inactivation, 1 copy	11q23.3	11:g.119148661_119152518	3857
SJ030416	CDKN2C	NM_001262.2	FOCAL DELETION	Whole gene	-	inactivation, 1 copy	1p32.3	1:g.51219926_51561960	342034
SJ030416	NF1	NM_000267.3	FOCAL DELETION	Whole gene	-	inactivation, 1 copy	17q11.2	17:g.27956569_30453579	2497010
SJ030416	SUZ12	NM_015355.3	FOCAL DELETION	Whole gene	-	inactivation, 1 copy	17q11.2	17:g.27956569_30453579	2497010
SJ030431	CDKN2A	NM_000077.4	FOCAL DELETION	Whole gene	-	inactivation, 2 copies	9p21.3	9:g.21167501_22234357	1066856
SJ030431	CDKN2B	NM_004936.3	FOCAL DELETION	Whole gene	-	inactivation, 2 copies	9p21.3	9:g.21167501_22234357	1066856
SJ030459	NF1	NM_000267.3	FOCAL DELETION	Whole gene	-	inactivation, 1 copy	17q11.2	17:g.29109110_30379500	1270390
SJ030459	SUZ12	NM_015355.3	FOCAL DELETION	Whole gene	-	inactivation, 1 copy	17q11.2	17:g.29109110_30379500	1270390
SJ030547	NF1	NM_000267.3	FOCAL DELETION	Exon 1	out-of-frame	inactivation, 1 copy	17q11.2	17:g.28983801_29426500	442699
SJ030683	KMT2C	NM_170606.2	FOCAL DELETION	Exons 2-59	out-of-frame	inactivation, 2 copies	7q36.1	7:g.152078914_152522800	443886
SJ030689	EBF1	NM_024007.4	FOCAL DELETION	Exons 1-6	out-of-frame	inactivation, 1 copy	5q33.3	5:g.158437989_158527997	90008
SJ030778	KMT2A*	NM_005933.3	PTD	Exons 4-8	in-frame	activation	11q23.3	11:g.118347001_118353900	6899
SJ030988	PHF6	NM_001015877.2	FOCAL GAIN	Exons 6-7	out-of-frame	inactivation, 1 copy	Xq26.2	X:g.133548730_133547011	1719
SJ030988	NF1	NM_000267.3	FOCAL DELETION	Whole gene	-	inactivation, 1 copy	17q11.2	17:g.28973901_30386300	1412399
SJ030988	SUZ12	NM_015355.3	FOCAL DELETION	Whole gene	-	inactivation, 1 copy	17q11.2	17:g.28973901_30386300	1412399
SJ031082	TBL1XR1	NM_024665.5	FOCAL DELETION	Exons 11-16	out-of-frame	inactivation, 1 copy	3q26.32	3:g.176754526_176760094	5568
SJ031082	TP53	NM_000546.5	FOCAL DELETION	Whole gene	-	inactivation, 1 copy	17q13.3q13.2	17:g.1_4107158	4107000
SJ031106	NF1	NM_000267.3	FOCAL GAIN	Exon 4	out-of-frame	inactivation, 1 copy	17q11.2	17:g.29494187_29489783	4404
SJ031302	CBL	NM_005188.3	FOCAL DELETION	Exon 9	in-frame	inactivation, 1 copy	11q23.3	11:g.119149208_119149840	632
SJ031311	CBL	NM_005188.3	FOCAL DELETION	Exon 9	in-frame	inactivation, 1 copy	11q23.3	11:g.119149066_119150698	1632
SJ031343	RUNX1	NM_001754.4	FOCAL GAIN	Intron 8- exon 9p	out-of-frame	inactivation, 1 copy	21q22.12	21:g.36166605_36164662	1943
SJ031343	ETV6	NM_001987.4	FOCAL DELETION	Exon 2	out-of-frame	inactivation, 1 copy	12p13.2	12:g.11877621_11974485	96864
SJ031343	NF1	NM_000267.3	FOCAL DELETION	Whole gene	-	inactivation, 1 copy	17q11.2	17:g.28442585_30499656	2057071
SJ031343	SUZ12	NM_015355.3	FOCAL DELETION	Whole gene	-	inactivation, 1 copy	17q11.2	17:g.28442585_30499656	2057071
SJ031469	ZBTB7A	NM_015898.3	FOCAL DELETION	Exons 2-3	out-of-frame	inactivation, 1 copy	19p13.3	19:g.4003727_4066540	62813
SJ031527	STAG2	NM_001042749.2	FOCAL DELETION	Exons 28-34	out-of-frame	inactivation, 1 copy	Xq25	X:g.123215296_123229960	14664
SJ031736	RB1	NM_000321.2	FOCAL DELETION	Whole gene	-	inactivation, 1 copy	13q14.2	13:g.48009073_51721278	3712205
SJ031781	BCOR	NM_017745.5	FOCAL DELETION	Whole gene	-	inactivation, 1 copy	Xp11.4	X:g.38091732_40150871	2059139
SJ032017	CBL	NM_005188.3	FOCAL DELETION	Exons 8-9	in-frame	inactivation, 1 copy	11q23.3	11:g.119148722_119149709	987
SJ032027	KMT2A*	NM_005933.3	PTD	Exons 3-7	in-frame	activation	11q23.3	11:g.118352527_118342958	9569
SJ032056	KMT2A*	NM_005933.3	PTD	Exons 2-8	in-frame	activation	11q23.3	11:g.118338001_118353900	15899
SJ032072	EED	NM_003797.4	FOCAL DELETION	Exons 6-8	out-of-frame	inactivation, 1 copy	11q14.2	11:g.85968527_85978735	10208
SJ032072	ELF1	NM_172373.3	FOCAL DELETION	Exon 2	out-of-frame	inactivation, 1 copy	13q14.11	13:g.41549830_41567176	17346
SJ032201	ZBTB7A	NM_015898.3	FOCAL DELETION	Exon 3	out-of-frame	inactivation, 1 copy	19p13.3	19:g.3696264_4052100	355836
SJ032201	RUNX1	NM_001754.4	FOCAL DELETION	Whole gene	-	inactivation, 1 copy	21q22.11q22.12	21:g.34675412_36456833	1781421
SJ032325	KMT2D	NM_003482.3	FOCAL GAIN	Exons 38p-42	out-of-frame	inactivation, 1 copy	12q13.12	12:g.49424019_49428078	4059
SJ032364	ELF1	NM_172373.3	FOCAL DELETION	Exons 1-2	out-of-frame	inactivation, 1 copy	13q14.11	13:g.41536261_41619971	83710
SJ032364	RAD52	NM134424.4	FOCAL DELETION	Exons 3-12	out-of-frame	inactivation, 1 copy	12p13.33	12:g.187001_1040894	853893
Abbreviations
*	Potential driver for AML
PTD	Partial tandem duplication
P	Partially involving exonic region

## Sheet: S4 - LS-CNVs
Supplementary Table S4. Large scale copy number alterations (LS-CNV) detected by WGS tumor genomic profiling.
	WGS tumor only CNV			Genomic Position
SampleID	CNV location ø = no reportable variant	Size (kb)	Copy number change*	Start	End	Significance	Comment
SJ030069	21q11.2-q22.3	32934	1.05693	15185001	48119800	other
SJ030077	ø
SJ030079	6p25.3-q27	170960	0.506589	90701	171050900	other
SJ030079	8p23.3-q24.3	146270	0.483163	33501	146303800	other
SJ030079	14q11.2-q32.33	84323	0.477306	22965901	107289500	other
SJ030079	18p11.32-q23	78007	0.802343	10001	78017200	other
SJ030079	19p13.3-q13.43	59029	0.693997	89201	59118800	other
SJ030079	22q11.1-q13.33	34386	0.43631	16847901	51234500	other
SJ030085	8p23.3-q24.3	146203	0.617371	100701	146303800	other
SJ030099	ø
SJ030118	ø
SJ030119	Xp22.33-q28	152230	-0.965986	2699501	154930300	other
SJ030120	8p23.3-q24.3	146270	1.03556	33501	146303800	other
SJ030120	21p11.2-q22.3	38708	1.0697	9411201	48119800	other
SJ030151	22q11.1-q13.33	34386	0.888889	16847901	51234500	other
SJ030153	5q35.1-q35.3	8073	0.51 *	172662601	180736100	other	* copy number changes interpreted in relation to a tetraploid level (4n); supportive evidence for a duplication of the genome was provided by conventional karyotyping (96,XXYY,-7,+8,-9,del(9)(p22)x2,+14,+18,+19,+20,+22[cp12][12]/46,XY[8])
SJ030153	6p25.3-q27	170960	0.46 *	90701	171050900	other
SJ030153	7p14.1-q36.3	159118	- 0.56 *	10001	159128500	other
SJ030153	8p23.3-q24.3	146203	1.07 *	100701	146303800	other
SJ030153	9p21.3-p21.1	11666.2	- 1.56 *	20935950	32602194	other
SJ030153	10p15.3-q26.3	135452	- 0.46 *	71701	135524700	other
SJ030153	13q11-q14.3	35876	0.51 *	19020701	54897433	other
SJ030153	14q11.2-q32.33	83374	0.44 *	22982926	106357577	other
SJ030153	18p11.32-q23	55273	0.78 *	10001	55283000	other
SJ030153	19p13.3-q13.43	58960	0.94 *	158501	59118800	other
SJ030153	20p13-q13.33	62904	0.59 *	60001	62965000	other
SJ030153	22q11.1-q13.33	34193	0.66 *	17038201	51234500	other
SJ030153	Yp11.31-q12	26168	- 0.52 *	2649501	28817600	other
SJ030155	19p13.3-q13.43	59029.6	1.11	89201	59118800	other
SJ030155	21q11.2-q22.3	33751	3.38918	14368401	48119800	other
SJ030156	7p22.3-q36.3	159118	-0.979079	10001	159128500	AML-MR defining ls-CNV
SJ030156	18p11.32-q23	77971	1.08508	46101	78017200	other
SJ030163	ø
SJ030186	ø
SJ030195	5q21.3-q35.3	74994	-0.987952	105790601	180785400	AML-MR defining ls-CNV
SJ030200	ø
SJ030208	Yp11.31-q12	26168	-0.998755	2649501	28817600	other
SJ030209	ø
SJ030210	21q11.2-q22.3	33781.4	1.06	14338401	48119800	other
SJ030231	ø
SJ030233	16q12.1-q22.1	19259	-0.782	50124989	69384257	other
SJ030286	ø
SJ030287	ø
SJ030297	3q26.2-q29	29230	0.994	168717861	197948400	other
SJ030297	7q21.2-q36.3	66738	-0.886	92389953	159128500	AML-MR defining ls-CNV
SJ030320	ø
SJ030322	ø
SJ030324	8p11.1-q24.3	146203	1.2	100701	146303800	other
SJ030345	3q26.2-q29	29163	1.10227	168785259	197948400	other
SJ030345	7q21.2-q36.3	66674	-0.959091	92454455	159128500	AML-MR defining ls-CNV
SJ030361	ø
SJ030410	1p35.2-p21.3	66845	0.914	31220001	98065014
SJ030410	1p36.33-p35.2	31209	-0.796	10101	31220000	other
SJ030410	2q31.1-q37.3	72315	-0.824	170867783	243183600	other
SJ030410	5q32-q35.3	32622	-0.822	148113410	180736100	AML-MR defining ls-CNV
SJ030410	7q21.2-q36.3	66653	-0.826	92474508	159128500	AML-MR defining ls-CNV
SJ030410	9q21.32-q31.1	21682	-0.824	86467601	108149700	other
SJ030416	4p16.3-q35.2	190977	0.906	10501	190987600	other
SJ030416	6p25.3-p21.1	45200.7	0.638	90701	45291424	other
SJ030416	8p23.3-p12	32675	-0.246	33501	32708653	other
SJ030416	9p21.1-p13.1	10182	-0.842	29456601	39638800	other
SJ030416	9p24.2-p23	7535	0.93	2529361	10064765	other
SJ030416	12p13.31-p12.1	17379	-0.87	6791501	24171300	AML-MR defining ls-CNV
SJ030416	13q13.1-q22.3	44999	-0.908	32905740	77905621	AML-MR defining ls-CNV
SJ030416	17p13.3-p11.2	21566	-0.744	1	21566500	AML-MR defining ls-CNV
SJ030416	Yp11.31-q11.23	26150	-0.302	2649501	28799600	other
SJ030430	ø
SJ030440	6p25.3-p22.1	27361	-0.851613	90701	27451800	other
SJ030440	8q13.1-q24.3	79158	0.830108	67145701	146303800	other
SJ030454	ø
SJ030459	17p13.3-p11.2	18928	-0.92	1	18928500	AML-MR defining ls-CNV
SJ030459	17p11.2-q25.3	62054.3	1.38	19140801	81195100	AML-MR defining ls-CNV
SJ030459	19p13.3-q13.43	59029	0.913191	89201	59118800	other
SJ030459	Yp11.31-q12	26168	-0.994363	2649501	28817600	other
SJ030464	ø
SJ030471	Xp22.33-q28	152230	-1.03424	2699501	154930300	other
SJ030509	8p11.22-q24.3	146270	1.11	33501	146303800	other
SJ030510	21q11.2-q22.3	33781	0.349842	14338401	48119800	other
SJ030547	7q31.1-q36.3	47856	-0.830853	111272401	159128500	AML-MR defining ls-CNV
SJ030547	11q14.1-q25	52422	0.960758	82523901	134946400	other
SJ030560	7p22.3-q36.3	159097	-0.965066	30501	159128500	AML-MR defining ls-CNV
SJ030561	22q11.1-q13.33	35179	0.438356	16054601	51234500	other
SJ030592	ø
SJ030601	Xp22.33-q28	152230	-0.528497	2699501	154930300	other
SJ030612	ø
SJ030617	ø
SJ030624	ø
SJ030643	ø
SJ030669	Yp11.31-q12	26168	-1.14593	2649501	28817600	other
SJ030683	ø
SJ030689	ø
SJ030690	21q11.2-q22.3	33781	0.774108	14338401	48119800	other
SJ030708	5q13.3-q35.3	105337	-0.98543	75447915	180785400	AML-MR defining ls-CNV
SJ030708	5p15.33-p13.3	31358	-0.996026	11701	31370325	other
SJ030708	11q22.1-q25	36346	2.66	98600401	134946400	other	multiple segments with varying degrees of copy number gain, including KMT2A amplification
SJ030708	12p13.33-p11.23	27535	-0.842384	60701	27595900	AML-MR defining ls-CNV
SJ030708	17p13.3-q25.3	81195	-0.47	1	81195100	AML-MR defining ls-CNV
SJ030708	18p11.32-q23	78007	-0.866225	10001	78017200	other
SJ030714	ø					other
SJ030727	7p22.3-q36.3	159118	-0.873181	10001	159128500	AML-MR defining ls-CNV
SJ030773	8p23.3-q24.3	146270	0.780488	33501	146303800	other
SJ030773	20p13-q13.33	62904	0.617886	60001	62965000	other
SJ030773	21p11.2-q22.3	38708	0.772358	9411201	48119800	other
SJ030778	Yp11.31-q11.23	26120	-0.983854	2649501	28770400	other
SJ030799	5q31.1-q33.3	25906	-0.91	130835201	156741200	AML-MR defining ls-CNV
SJ030799	7q22.1-q34	36186.2	-0.85	103573742	139759936	AML-MR defining ls-CNV
SJ030852	ø
SJ030881	8p23.3-q24.3	146203	1.11722	100701	146303800	other
SJ030881	Xp22.33-q28	149411	-0.978292	2699501	152111414	other
SJ030934	ø
SJ030947	8p23.3-q24.3	146270	1.08824	33501	146303800	other
SJ030987	ø
SJ030988	ø
SJ031022	ø
SJ031051	ø
SJ031075	8p23.3-q24.3	146203	1.06947	100701	146303800	other
SJ031082	8q12.2-q24.3	84369	0.356	61934748	146303800	other
SJ031082	10p15.3-q26.3	135452	0.932	71701	135524700	other
SJ031120	19p13.3-q13.43	59029	0.367647	89201	59118800	other
SJ031121	ø
SJ031186	9q13-q31.1	37551	-0.852356	67684501	105236100	other
SJ031188	Yp11.31-q12	26168	-0.54878	2649501	28817600	other
SJ031200	ø
SJ031206	7p22.3-q36.3	159118	-0.984848	10001	159128500	AML-MR defining ls-CNV
SJ031249	ø
SJ031254	4p16.3-q35.2	191033	0.31	10501	191043900	other
SJ031259	ø
SJ031272	ø
SJ031300	8p23.3-q24.3	146270	1.07	33501	146303800	other
SJ031300	21q11.2-q22.3	33750	1.07133	14369501	48119800	other
SJ031302	ø
SJ031311	11q14.3-q22.3	15921	-1.02146	92265195	108186808	AML-MR defining ls-CNV
SJ031312	ø
SJ031343	ø
SJ031359	2p25.3-q37.3	243173	0.97772	10001	243183600	other
SJ031359	13q11-q34	95768	0.972477	19341601	115109800	other
SJ031399	ø
SJ031409	ø
SJ031417	8p23.3-q24.3	146270	1.30809	33501	146303800	other
SJ031419	ø
SJ031434	ø
SJ031469	ø
SJ031477	ø
SJ031527	22q12.2-q13.33	20504	0.952727	30729938	51234500	other
SJ031528	ø
SJ031554	ø
SJ031579	7p22.3-q36.3	120735	-1.02	10001	159128500	AML-MR defining ls-CNV
SJ031601	7p22.3-p11.2	54904	-0.998909	10001	54914073	other
SJ031601	7q31.1-q36.3	47961	-0.994547	111167225	159128500	AML-MR defining ls-CNV
SJ031606	6q14.1-q27	94230	-1.00528	76820801	171050900	other
SJ031606	7p22.3-q36.3	159118	-0.992084	10001	159128500	AML-MR defining ls-CNV
SJ031606	21q22.12-q22.3	11247	1.05013	36872001	48119800	other
SJ031666	Xp22.33-q28	152230	-0.713745	2699501	154930300	other
SJ031686	4q34.2-q35.2	14648	-0.549601	176395301	191043900	other
SJ031686	7q33-q36.3	23461	-0.27138	135667206	159128500	AML-MR defining ls-CNV
SJ031686	8p23.3-q24.3	146203	1.0171	100701	146303800	other
SJ031686	13q21.1-q34	55992.9	0.62	59116883	115109800	other
SJ031719	3p26.3-p24.2	25408	0.901099	60201	25468863	other
SJ031719	3q26.32-q29	21148	-0.849817	176769010	197917300	other
SJ031719	11q14.1q23.1	25709	-0.42	85173777	110882819	AML-MR defining ls-CNV
SJ031719	16p13.3-p13.2	8465	-0.879121	60001	8525646	other
SJ031719	16q12.2-q24.3	34097	-0.862027	56195148	90292700	other
SJ031736	20q11.21-q11.23	5616.07	0.87	29848842	35464912	other
SJ031736	20q11.23-q13.33	24705	-0.366379	35464913	60170454	other
SJ031737	8p23.3-q24.3	146270	0.347291	33501	146303800	other
SJ031760	Yp11.31-q11.23	26130	-0.992529	2649501	28779800	other
SJ031769	6p25.3-q27	170960	1.09305	90701	171050900	other
SJ031781	7p22.3-q36.3	38281	-0.986094	10001	159128500	AML-MR defining ls-CNV
SJ031855	22q11.1-q13.33	34386	0.628849	16847901	51234500	other
SJ031924	ø
SJ031974	9q13-q31.1	34174	-0.986047	68426601	102600900	other
SJ031974	Xp22.33-q28	152230	-1.12093	2699501	154930300	other
SJ032017	ø
SJ032027	ø
SJ032052	ø
SJ032056	ø
SJ032070	ø
SJ032072	2q11.2-q37.1	145208	1	97975601	243183600	other
SJ032072	6p25.3-p21.31	34051.1	0.988235	90701	34141782	other
SJ032072	7p15.2-q36.3	131914	0.950588	27214620	159128500	other
SJ032072	8p23.3-q24.3	146203	0.945882	100701	146303800	other
SJ032072	10p15.3-q26.3	135452	0.950588	71701	135524700	other
SJ032072	19p13.3-q13.43	59029	1.00235	89201	59118800	other
SJ032072	22q11.1-q12.1	11550	1.01647	16847901	28398033	other
SJ032097	9q21.11-q31.1	35108	-0.964554	70484101	105592400	other
SJ032106	ø
SJ032127	ø
SJ032148	ø
SJ032172	ø
SJ032178	4p16.3-q35.2	191033	0.338129	10501	191043900	other
SJ032178	10p15.3-q26.3	135452	1.04317	71701	135524700	other
SJ032187	9q13-q21.33	19854	-0.996556	68148701	88003200	other
SJ032201	5q31.1-q34	30796	-0.983827	131467144	162263604	AML-MR defining ls-CNV
SJ032201	6q12-q27	106488	-0.975741	64562001	171050900	other
SJ032201	7q21.3-q36.1	56156	-0.983827	93424436	149580921	AML-MR defining ls-CNV
SJ032201	7p22.2-p21.2	13084.1	0.93	3179501	16263580	other
SJ032201	7p14.3-p11.1	27234.1	-0.73	30820072	58054200	other
SJ032201	11p15.5-p15.4	6975	-0.962264	133701	7108886	other
SJ032201	11p15.2-p15.1	5488.5	1.57	14797420	20285920	other
SJ032201	12p12.3-p11.22	12758	-0.978437	15417986	28176600	AML-MR defining ls-CNV
SJ032201	17p13.3-p13.1	7590	-0.978437	1	7590690	AML-MR defining ls-CNV
SJ032201	21q21.3-q22.12	7948.85	-0.96496	28509901	36458748	other
SJ032210	13q14.2-q21.1	10937	-0.959716	48419530	59357044	AML-MR defining ls-CNV
SJ032210	5q21.3-q31.3	34626	-0.985782	108499076	143125980	AML-MR defining ls-CNV
SJ032233	22q11.1-q13.33	34386	0.878378	16847901	51234500	other
SJ032253	ø
SJ032297	2q33.3-q37.3	35817	-0.791176	207366053	243183600	other
SJ032319	ø
SJ032324	ø
SJ032325	ø
SJ032347	ø
SJ032355	ø
SJ032364	1q25.3-q44	68714	0.877506	180526011	249240500	other
SJ032364	6p25.3-q27	170960	1.46548	90701	171050900	other
SJ032364	7p22.3-q36.3	159118	0.552339	10001	159128500	other
SJ032364	22q11.1-q13.33	34386	0.935412	16847901	51234500	other
SJ032378	ø
SJ032403	7q31-q36	50126	-0.416501	108998496	159124447	AML-MR defining ls-CNV
SJ032403	Yp11.31-q12	26168	-1.05047	2649501	28817600	other
SJ032419	ø
SJ032424	ø
SJ032429	ø
SJ032440	ø
SJ032452	ø
SJ032453	12p13.33-p11.1	33777.1	-0.76	1074562	34851700	AML-MR defining ls-CNV
SJ032480	ø
SJ032498	ø
SJ032526	8p23.3-q24.3	140179	1.55	100701	140279900	other
SJ032552	21q11.2-q22.3	33781	0.448802	14338401	48119800	other
SJ032598	Yp11.31-q12	26168	-0.491754	2649501	28817600	other
SJ032692	3q26.2-q29	29181	1.05943	168767393	197948400	other
SJ032692	7q21.2-q36.3	66677	-0.997416	92451026	159128500	AML-MR defining ls-CNV
SJ032699	11q23.1-q25	24234	0.912458	110711701	134946400	other

## Sheet: S5 - SVs
Supplementary Table S5. Pathogenic and likely pathogenic structural variants (SVs) identified by iWGS-WTS in the study cohort.
Sample ID	Karyotype (ISCN) predicted from WGS	Structural Variant	Gene Transcripts	Effect	AML driver	WGS	WTS	Cytogenetics
SJ030069	t(6;11)(q27;q23.3)	KMT2A::MLLT4	NM_005933.4 / NM_001040000.3	KMT2A exon 8 fused to MLLT4 exon 2	yes	✓	✓	✓
SJ030079	t(9;11)(p21.3;q23.3)	KMT2A::MLLT3	NM_005933.4 / NM_004529.3	KMT2A exon 9 fused to MLLT3 exon 6	yes	✓	✓	✓
SJ030085	t(11;17)(q23;q12)	KMT2A::MLLT6	NM_005933.4 / NM_005937.3	KMT2A exon 7 fused to MLLT4 exon 13	yes	✓	✓	✓
SJ030118	t(9;11)(p21.3;q23.3)	KMT2A::MLLT3	NM_005933.4 / NM_004529.3	KMT2A exon 8 fused to MLLT3 exon 6	yes	✓	✓	✓
SJ030119	t(8;21)(q21.3;q22.1)	RUNX1::RUNX1T1	NM_001754.4 / NM_004349.3	RUNX1 exon 6 is fused to RUNX1T1 exon 2	yes	✓	✓	✓
SJ030120	inv(16)(p13.3q24.3)	CBFA2T3::GLIS2	NM_005187.5 / NM_032575.2	CBFA2T3 exon 11 is fused to GLIS2 exon 3	yes	✓	✓	ø
SJ030151	inv(16)(p13.1q22)	CBFB::MYH11	NM_022845.2 / NM_002474.2	CBFB exon 5 is fused to MYH11 exon 33	yes	✓	✓	✓
SJ030153	t(5;14)(q35;q32.2)	See Effect	N/A	No effect observed in WTS analysis. Clinical significance is unclear.	no	✓	ø	ø
SJ030155	t(9;11)(p21.3;q23.3)	KMT2A::MLLT3	NM_005933.4 / NM_004529.3	KMT2A exon 8 fused to MLLT3 exon 6	yes	✓	✓	✓
SJ030163	t(8;21)(q21.3;q22.1)	RUNX1::RUNX1T1	NM_001754.4 / NM_004349.3	RUNX1 exon 6 is fused to RUNX1T1 exon 2	yes	✓	✓	✓
SJ030195	t(8;21)(q21.3;q22.1)	RUNX1::RUNX1T1	NM_001754.4 / NM_004349.3	RUNX1 exon 6 is fused to RUNX1T1 exon 2	yes	✓	✓	✓
SJ030200	t(11;19)(q23.3;p13.11)	KMT2A::ELL	NM_005933.4 / NM_006532.4	KMT2A exon 10 is fused to ELL exon 6	yes	✓	✓	✓
SJ030208	t(8;21)(q21.3;q22.1)	RUNX1::RUNX1T1	NM_001754.4 / NM_004349.3	RUNX1 exon 6 is fused to RUNX1T1 exon 2	yes	✓	✓	✓
SJ030209	t(1;22)(p13;q13)	RBM15::MRTFA	NM_022768.4 / NM_020831.5	RBM15 exon 1 fused to MKL1 exon 4	yes	✓	✓	ø
SJ030210	t(9;11)(p21.3;q23.3)	KMT2A::MLLT3	NM_005933.4 / NM_004529.3	KMT2A exon 10 fused to MLLT3 exon 6	yes	✓	✓	N/A
SJ030231	inv(16)(p13.1q22)	CBFB::MYH11	NM_022845.2 / NM_002474.2	CBFB exon 5 is fused to MYH11 exon 33	yes	✓	✓	✓
SJ030233	t(15;17)(q24.1;q21.1)	PML::RARA	NM_033238.3 / NM_000964.4	PML exon 3 is fused to RARA exon 3	yes	✓	✓	✓
SJ030287	t(15;17)(q24.1;q21.1)	PML::RARA	NM_033238.3 / NM_000964.4	PML exon 3 is fused to RARA exon 3	yes	✓	✓	✓
SJ030297	t(3;7)(q26.2;q21.1)	CDK6::MECOM	NM/001259.7 / NM_001105077.3	Enhancer hijacking, MECOM overexpression	yes	✓	ø	ø
SJ030322	t(2;17)(q37.1;q11.2)	NF1 truncation	NM_000267.3	Truncation of NF1 at exon 2	no	✓	✓	✓
SJ030324	t(10;11)(p12.3;q23.3)	KMT2A::MLLT10	NM_005933.4 / NM_004641.3	KMT2A exon 7 is fused to MLLT10 exon 15	yes	✓	✓	✓
SJ030345	t(3;7)(q26.2;q21.2)	CDK6::MECOM	NM/001259.7 / NM_001105077.3	Enhancer hijacking, MECOM overexpression	yes	✓	ø	ø
SJ030361	t(10;11)(p12.3;q23.3)	KMT2A::MLLT10	NM_005933.4 / NM_004641.3	KMT2A exon 6 is fused to MLLT10 exon 15	yes	✓	✓	ø
SJ030410	7(p15.2;q21.1)	CDK6::HOXA13	NM_001259.7 / NM_000522.4	Enhancer hijacking, HOXA13 overexpression	yes	✓	ø	ø
SJ030430	inv(16)(p13.1q22)	CBFB::MYH11	NM_022845.2 / NM_002474.2	CBFB exon 5 is fused to MYH11 exon 33	yes	✓	✓	✓
SJ030431	t(5;14)(q35;q32.2)	See Effect	N/A	No effect observed in WTS analysis. Clinical significance is unclear.	no	✓	ø	ø
SJ030440	t(9;11)(p21.3;q23.3)	KMT2A::MLLT3	NM_005933.4 / NM_004529.3	KMT2A exon 9 fused to MLLT3 exon 5	yes	✓	✓	✓
SJ030454	t(8;21)(q21.3;q22.1)	RUNX1::RUNX1T1	NM_001754.4 / NM_004349.3	RUNX1 exon 6 is fused to RUNX1T1 exon 1	yes	✓	✓	✓
SJ030459	t(10;11)(p12.31;q14.2)	PICALM::MLLT10	NM_007166.3 / NM_004641.3	PICALM exon 19 is fused to MLLT10 exon 4	yes	✓	✓	✓
SJ030464	t(9;11)(p21.3;q23.3)	KMT2A::MLLT3	NM_005933.4 / NM_004529.3	KMT2A exon 8 fused to MLLT3 exon 9	yes	✓	✓	✓
SJ030471	t(8;21)(q21.3;q22.1)	RUNX1::RUNX1T1	NM_001754.4 / NM_004349.3	RUNX1 exon 6 is fused to RUNX1T1 exon 2	yes	✓	✓	✓
SJ030509	t(16,21)(q24.3;q22.12)	RUNX1::CBFA2T3	NM_001754.4 / NM_005187.5	RUNX1 exon 6 is fused to CBFA2T3 exon 4	yes	✓	✓	✓
SJ030534	t(11;19)(q23.3;p13.11)	KMT2A::ELL	NM_005933.4 / NM_006532.4	KMT2A exon 8 is fused to ELL exon 2	yes	✓	✓	✓
SJ030547	t(21;7)(q22.12;p15.2)	RUNX1::EVX1	NM_001754.4 / NM_001989.4	RUNX1 exon 6 is fused to EVX1 exon 2	Predicted to be, rare driver	✓	✓	✓
SJ030560	inv(3)(q21.3q26.2)	MECOM	NM_001105077.3	Enhancer hijacking, MECOM overexpression	yes	✓	ø	✓
SJ030561	inv(16)(p13.1q22)	CBFB::MYH11	NM_022845.2 / NM_002474.2	CBFB exon 5 is fused to MYH11 exon 33	yes	✓	✓	✓
SJ030592	t(8;21)(q21.3;q22.1)	RUNX1::RUNX1T1	NM_001754.4 / NM_004349.3	RUNX1 exon 6 is fused to RUNX1T1 exon 2	yes	✓	✓	✓
SJ030601	t(8;21)(q21.3;q22.1)	RUNX1::RUNX1T1	NM_001754.4 / NM_004349.3	RUNX1 exon 6 is fused to RUNX1T1 exon 1	yes	✓	✓	✓
SJ030612	inv(16)(p13.1q22)	CBFB::MYH11	NM_022845.2 / NM_002474.2	CBFB exon 5 is fused to MYH11 exon 33	yes	✓	✓	✓
SJ030617	inv(16)(p13.1q22)	CBFB::MYH11	NM_022845.2 / NM_002474.2	CBFB exon 5 is fused to MYH11 exon 33	yes	✓	✓	N/A
SJ030624	t(10;11)(p12.3;q23.3)	KMT2A::MLLT10	NM_005933.4 / NM_004641.3	KMT2A exon 9 is fused to MLLT10 exon 10	yes	✓	✓	✓
SJ030669	t(8;21)(q21.3;q22.1)	RUNX1::RUNX1T1	NM_001754.4 / NM_004349.3	RUNX1 exon 6 is fused to RUNX1T1 exon 2	yes	✓	✓	✓
SJ030683	inv(16)(p13.1q22)	CBFB::MYH11	NM_022845.2 / NM_002474.2	CBFB exon 5 is fused to MYH11 exon 33	yes	✓	✓	✓
SJ030689	t(9;11)(p21.3;q23.3)	KMT2A::MLLT3	NM_005933.4 / NM_004529.3	KMT2A exon 10 fused to MLLT3 exon 6	yes	✓	✓	✓
SJ030773	t(4;10)(p12;p12.31)	TEC::MLLT10	NM_003215.2 / NM_004641.3	TEC exon 9 is fused to MLLT10 exon 9	Predicted to be, rare driver	✓	✓	ø
SJ030799	t(2;3)(p21;q26.2)	MECOM	NM_001105077.3	MECOM overexpression	yes	✓	ø	ø
SJ030852	t(8;16)(p11.21;p13.3)	KAT6A::CREBBP	NM_006766 / NM_004380	KAT6A exon 17 is fused to CREBBP exon 2	yes	✓	✓	✓
SJ030881	t(8;21)(q21.3;q22.1)	RUNX1::RUNX1T1	NM_001754.4 / NM_004349.3	RUNX1 exon 6 is fused to RUNX1T1 exon 2	yes	✓	✓	✓
SJ030987	t(10;11)(p12.3;q23.3)	KMT2A::MLLT10	NM_005933.4 / NM_004641.3	KMT2A exon 7 is fused to MLLT10 exon 14	yes	✓	✓	✓
SJ030988	t(10;11)(p12.31;q14.2)	PICALM::MLLT10	NM_007166.3 / NM_004641.3	PICALM exon 19 is fused to MLLT10 exon 9	yes	✓	✓	✓
SJ031022	t(8;21)(q21.3;q22.1)	RUNX1::RUNX1T1	NM_001754.4 / NM_004349.3	RUNX1 exon 6 is fused to RUNX1T1 exon 2	yes	✓	✓	✓
SJ031051	t(11;17)(q23;q12)	KMT2A::MLLT6	NM_005933.4 / NM_005937.3	KMT2A exon 8 fused to MLLT4 exon 8	yes	✓	✓	✓
SJ031082	t(16;21)(p11.2;q22.2)	FUS::ERG	NM_004960.3 / NM_182918.4	FUS exon 7 is fused to ERG exon 9	yes	✓	✓	✓
SJ031120	t(9;11)(p21.3;q23.3)	KMT2A::MLLT3	NM_005933.4 / NM_004529.3	KMT2A exon 8 fused to MLLT3 exon 9	yes	✓	✓	✓
SJ031121	t(X;6)(p11.23;q23.3)	MYB::GATA1	NM_001130173.1 / NM_002049.3	MYB exon 8 is fused to GATA1 exon 5	yes	✓	✓	ø
SJ031186	t(8;21)(q21.3;q22.1)	RUNX1::RUNX1T1	NM_001754.4 / NM_004349.3	RUNX1 exon 6 is fused to RUNX1T1 exon 2	yes	✓	✓	✓
SJ031188	t(8;21)(q21.3;q22.1)	RUNX1::RUNX1T1	NM_001754.4 / NM_004349.3	RUNX1 exon 6 is fused to RUNX1T1 exon 1	yes	✓	✓	✓
SJ031200	t(8;21)(q21.3;q22.1)	RUNX1::RUNX1T1	NM_001754.4 / NM_004349.3	RUNX1 exon 6 is fused to RUNX1T1 exon 2	yes	✓	✓	✓
SJ031206	t(11;1)(q24.1;p36.32)	HSPA8::PRDM16	NM_006597.5 / NM_022114.3	HSPA8 exon 2 is fused to PRDM16 exon 2. RNAseq expression showed upregulation of PRDM16	Expected to be	✓	✓	ø
SJ031249	t(9;11)(p21.3;q23.3)	KMT2A::MLLT3	NM_005933.4 / NM_004529.3	KMT2A exon 8 fused to MLLT3 exon 10	yes	✓	✓	✓
SJ031254	t(11;4)(q23;p15.4)	NUP98::RAP1GDS1	NM_016320.5 / NM_00100426.2	NUP98 exon 11 is fused to RAP1GDS1 exon 2	yes	✓	✓	N/A
SJ031259	t(4;9)(q12;q33.3)	CNTRL::KIT	NM_007018.4/ NM_000222.2	CNTRL exon 17 is fused to KIT exon 11, predicted to activate KIT	no	✓	✓	✓
SJ031259	inv(16)(p13.1q22)	CBFB::MYH11	NM_022845.2 / NM_002474.2	CBFB exon 5 is fused to MYH11 exon 33	yes	✓	✓	✓
SJ031300	t(10;11)(p12.3;q23.3)	KMT2A::MLLT10	NM_005933.4 / NM_004641.3	KMT2A exon 8 is fused to MLLT10 exon 16	yes	✓	✓	✓
SJ031302	inv(16)(p13.1q22)	CBFB::MYH11	NM_022845.2 / NM_002474.2	CBFB exon 5 is fused to MYH11 exon 33	yes	✓	✓	✓
SJ031311	t(10;11)(p12.3;q23.3)	KMT2A::MLLT10	NM_005933.4 / NM_004641.3	KMT2A exon 8 is fused to MLLT10 exon 10	yes	✓	✓	✓
SJ031336	t(8;21)(q21.3;q22.1)	RUNX1::RUNX1T1	NM_001754.4 / NM_004349.3	RUNX1 exon 6 is fused to RUNX1T1 exon 2	yes	✓	✓	✓
SJ031359	t(11;19)(q23.3;p13.11)	KMT2A::ELL	NM_005933.4 / NM_006532.4	KMT2A exon 9 is fused to a cryptic exon derived from ELL intron 8 then to ELL exon 9	yes	✓	ø	ø
SJ031399	t(6;11)(q27;q23.3)	KMT2A::MLLT4	NM_005933.4 / NM_001040000.3	KMT2A exon 8 fused to MLLT4 exon 2	yes	✓	✓	✓
SJ031409	t(20;21)(q11.22;q22.12)	RUNX1::CBFA2T2	NM_001754.4 / NM_005093.3	RUNX1 exon 6 is fused to CBFA2T2 exon 3	yes	✓	✓	ø
SJ031417	t(11;19)(q23.3;p13.13)	KMT2A::MLLT1	NM_005933.4 / NM_005934.3	KMT2A exon 8 is fused to MLLT1 exon 2	yes	✓	✓	✓
SJ031434	t(5;11)(q35.3;p15.4)	NUP98::NSD1	NM_016320.5 / NM_172349.2	NUP98 exon 12 is fused to NSD1 exon 7	yes	✓	✓	ø
SJ031469	t(8;21)(q21.3;q22.1)	RUNX1::RUNX1T1	NM_001754.4 / NM_004349.3	RUNX1 exon 6 is fused to RUNX1T1 exon 2	yes	✓	✓	✓
SJ031528	t(11;19)(q23.3;p13.11)	KMT2A::ELL	NM_005933.4 / NM_006532.4	KMT2A exon 10 is fused to ELL exon 6	yes	✓	✓	✓
SJ031554	t(11;19)(q23.3;p13.11)	KMT2A::ELL	NM_005933.4 / NM_006532.4	KMT2A exon 11 is fused to ELL exon 2	yes	✓	ø	✓
SJ031601	t(8;21)(q21.3;q22.1)	RUNX1::RUNX1T1	NM_001754.4 / NM_004349.3	RUNX1 exon 6 is fused to RUNX1T1 exon 2	yes	✓	✓	✓
SJ031606	t(21;19)(q22.12;q13.2)	RUNX1::POU2F2	NM_001754.4 / NM_002698.4	RUNX1 exon 8 is fused to POU2F2 exon 2	Predicted to be, rare driver	✓	✓	ø
SJ031666	t(8;21)(q21.3;q22.1)	RUNX1::RUNX1T1	NM_001754.4 / NM_004349.3	RUNX1 exon 6 is fused to RUNX1T1 exon 2	yes	✓	✓	N/A
SJ031686	t(16,21)(q24.3;q22.12)	RUNX1::CBFA2T3	NM_001754.4 / NM_005187.5	RUNX1 exon 6 is fused to CBFA2T3 exon 4	yes	✓	✓	✓
SJ031719	t(3;3)(p24.2;q26.32)	TBL1XR1::RARB	NM _024665.5 / NM_000965.4	TBLIXR1 exon 5 is fused to RARB exon 2	yes	✓	✓	✓
SJ031736	t(11;12)(p15.4;p13.33)	NUP98::KDM5A	NM_016320.5 / NM_001042603.3	NUP98 exon 13 is fused to KDM5A exon 27	yes	✓	✓	ø
SJ031737	t(9;11)(p21.3;q23.3)	KMT2A::MLLT3	NM_005933.4 / NM_004529.3	KMT2A exon 8 fused to MLLT3 exon 6	yes	✓	✓	N/A
SJ031760	t(8;21)(q21.3;q22.1)	RUNX1::RUNX1T1	NM_001754.4 / NM_004349.3	RUNX1 exon 6 is fused to RUNX1T1 exon 2	yes	✓	✓	✓
SJ031781	inv(3)(q21.3q26.2)	MECOM	NM_001105077.3	Enhancer hijacking, MECOM overexpression	yes	✓	ø	✓
SJ031855	inv(16)(p13.1q22)	CBFB::MYH11	NM_022845.2 / NM_002474.2	CBFB exon 5 is fused to MYH11 exon 33	yes	✓	✓	✓
SJ031924	t(6;9)(p22.3;q34.13)	DEK::NUP214	NM_003472.3 / NM_005085.3	DEK exon 10 is fused to NUP214 exon 18	yes	✓	✓	✓
SJ031974	t(8;21)(q21.3;q22.1)	RUNX1::RUNX1T1	NM_001754.4 / NM_004349.3	RUNX1 exon 6 is fused to RUNX1T1 exon 2	yes	✓	✓	N/A
SJ032017	t(1;11)(q21.3;q23.3)	KMT2A::MLLT11	NM_005933.4 / NM_006818.3	KMT2A exon 9 is fused to MLLT11 exon 2	yes	✓	✓	✓
SJ032072	t(X;2)(q25;q31.1)	STAG2 truncation	NM_001042749.2	Truncation of STAG2 after exon 1	no	✓	✓	N/A
SJ032072	t(2;7)(p14;p15.2)	HOXA10::PLEK	NM_018951.3	HOXA10 overexpression	yes	✓	✓	N/A
SJ032097	t(5;11)(q35.3;p15.4)	NUP98::NSD1	NM_016320.5 / NM_172349.2	NUP98 exon 12 is fused to NSD1 exon 7	yes	✓	✓	N/A
SJ032148	t(8;21)(q21.3;q22.1)	RUNX1::RUNX1T1	NM_001754.4 / NM_004349.3	RUNX1 exon 6 is fused to RUNX1T1 exon 2	yes	✓	✓	✓
SJ032187	t(8;21)(q21.3;q22.1)	RUNX1::RUNX1T1	NM_001754.4 / NM_004349.3	RUNX1 exon 6 is fused to RUNX1T1 exon 2	yes	✓	✓	✓
SJ032201	t(12;17)(p12.3;p13.1)	TP53 promoter disruption	NM_000546.5	Disrupt the expression of TP53; no expression of TP53 observed in WTS (A 17p deletion detected by WGS, see Table S4)	Contribute to biallelic TP53 LOF	✓	ø	ø
SJ032233	inv(16)(p13.1q22)	CBFB::MYH11	NM_022845.2 / NM_002474.2	CBFB exon 5 is fused to MYH11 exon 33	yes	✓	✓	✓
SJ032253	inv(16)(p13.1q22)	CBFB::MYH11	NM_022845.2 / NM_002474.2	CBFB exon 5 is fused to MYH11 exon 33	yes	✓	✓	ø
SJ032297	t(16;11)(p11.2;q24.3)	FUS::FLI1	NM_004960.3 / NM_002017.4	FUS exon 11 is fused to FLI1 exon 8	yes	✓	✓	N/A
SJ032324	t(8;21)(q21.3;q22.1)	RUNX1::RUNX1T1	NM_001754.4 / NM_004349.3	RUNX1 exon 6 is fused to RUNX1T1 exon 2	yes	✓	✓	✓
SJ032364	t(21;2)(q22.12;q22.3)	RUNX1::ZEB2	NM_001754.4 / NM_014795.3	RUNX1 exon 6 is fused to ZEB2 exon 5	Predicted to be, rare driver	✓	✓	ø
SJ032376	t(8;21)(q21.3;q22.1)	RUNX1::RUNX1T1	NM_001754.4 / NM_004349.3	RUNX1 exon 6 is fused to RUNX1T1 exon 2	yes	✓	✓	N/A
SJ032377	t(21;7)(q22.12;p22.1)	RUNX1::USP42	NM_001754.4 / NM_032172.2	RUNX1 exon 7 is fused to USP42 exon 3	Predicted to be, rare driver	✓	✓	ø
SJ032403	t(8;21)(q21.3;q22.1)	RUNX1::RUNX1T1	NM_001754.4 / NM_004349.3	RUNX1 exon 6 is fused to RUNX1T1 exon 2	yes	✓	✓	✓
SJ032452	inv(16)(p13.1q22)	CBFB::MYH11	NM_022845.2 / NM_002474.2	CBFB exon 5 is fused to MYH11 exon 33	yes	✓	✓	N/A
SJ032453	t(9;11)(p21.3;q23.3)	KMT2A::MLLT3	NM_005933.4 / NM_004529.3	KMT2A exon 8 fused to MLLT3 exon 10	yes	✓	✓	✓
SJ032480	t(10;11)(p12.3;q23.3)	KMT2A::MLLT10	NM_005933.4 / NM_004641.3	KMT2A exon 8 is fused to MLLT10 exon 9	yes	✓	✓	✓
SJ032498	t(10;11)(p12.3;q23.3)	KMT2A::MLLT10	NM_005933.4 / NM_004641.3	KMT2A exon 8 is fused to MLLT10 exon 9	yes	✓	✓	N/A
SJ032552	t(10;11)(p12.3;q23.3)	KMT2A::MLLT10	NM_005933.4 / NM_004641.3	KMT2A exon 7 is fused to MLLT10 exon 9	yes	✓	✓	N/A
SJ032598	t(8;21)(q21.3;q22.1)	RUNX1::RUNX1T1	NM_001754.4 / NM_004349.3	RUNX1 exon 6 is fused to RUNX1T1 exon 2	yes	✓	✓	✓
SJ032692	t(3;7)(q26.2;q21.2)	CDK6::MECOM	NM/001259.7 / NM_001105077.3	Enhancer hijacking, MECOM overexpression	yes	✓	ø	ø
SJ032699	t(5;6)(q35.1;q24.1)	NPM1::CCDC28A	NM_002520.6 / NM_015439.3	NPM1 exon 10 is fused to CCDC28A exon 2	yes	✓	✓	N/A
Abbreviations
✓	detected
ø	not detected

## Sheet: S6A - Comparison WGS vs cKT
Supplemenetary Table S6A. Head-to-head comparison in the detectin of SVs and LS-CNVs across 126 cases with non-complex karyotype.
	Note: For the concordance findings, ‘✓’ - Straight concordance; ‘✓/x’ - Compatible findings between WGS and cKT, however, WGS further elucidated the corresponding chromosome abnormalities; 'cKTonly' - Event detected by karyotype analysis only; 'WGSonly’ - Event detected by WGS only; ‘X’ – Discordant finding that cannot be further clarified.
		SV comparison				CNV comparison
SampleID	Karyotype	WGS_SV, predicted chromosome translocation	WGS_SV, Predicted Fusion	WGS_SV significance	SV concordance WGS vs cKT	WGS_CNV, Cytoband ø = no reportable variant	WGS_CNV, Size (kb)	Copy number change*	Start	End	Significance	CNV concordance WGS vs cKT	Comment
SJ030069	46,XY,t(6;11)(q27;q23)[20]	t(6;11)(q27;q23.3)	KMT2A::MLLT4	driver	✓
SJ030069	46,XY,t(6;11)(q27;q23)[20]					21q11.2-q22.3	32934	1.05693	15185001	48119800		WGSonly	FISH analysis showed 3 signals of RUNX1 (21q22) in 93% of interphase cells scored, which confirmed the WGS finding of gain of chromosome 21.
SJ030077	47,XX,+21c[20]	ø				ø
SJ030079	52,XX,+6,+8,t(9;11)(p22;q23),+14,+17,+19,+22[9]/53,idem,+18[11]	t(9;11)(p21.3;q23.3)	KMT2A::MLLT3	driver	✓								K revisited, poor metaphases; FISH showed NO tri 17
SJ030079	52,XX,+6,+8,t(9;11)(p22;q23),+14,+17,+19,+22[9]/53,idem,+18[11]		KMT2A::MLLT3			6p25.3-q27	170960	0.506589	90701	171050900		✓
SJ030079	52,XX,+6,+8,t(9;11)(p22;q23),+14,+17,+19,+22[9]/53,idem,+18[11]		KMT2A::MLLT3			8p23.3-q24.3	146270	0.483163	33501	146303800		✓
SJ030079	52,XX,+6,+8,t(9;11)(p22;q23),+14,+17,+19,+22[9]/53,idem,+18[11]		KMT2A::MLLT3			14q11.2-q32.33	84323	0.477306	22965901	107289500		✓
SJ030079	52,XX,+6,+8,t(9;11)(p22;q23),+14,+17,+19,+22[9]/53,idem,+18[11]					See Comments						cKTonly	A trisomy 17 detected by karyotyping only, which failed to be confirmed by FISH analysis, indicating that the karyotype interpretation is inaccurate.
SJ030079	52,XX,+6,+8,t(9;11)(p22;q23),+14,+17,+19,+22[9]/53,idem,+18[11]		KMT2A::MLLT3			18p11.32-q23	78007	0.802343	10001	78017200		✓
SJ030079	52,XX,+6,+8,t(9;11)(p22;q23),+14,+17,+19,+22[9]/53,idem,+18[11]		KMT2A::MLLT3			19p13.3-q13.43	59029	0.693997	89201	59118800		✓
SJ030079	52,XX,+6,+8,t(9;11)(p22;q23),+14,+17,+19,+22[9]/53,idem,+18[11]		KMT2A::MLLT3			22q11.1-q13.33	34386	0.43631	16847901	51234500		✓
SJ030085	46,XX,t(11;17)(q23;q12)[13]/47,idem,+8[5]/46,XX[2]	t(11;17)(q23;q12)	KMT2A::MLLT6	driver	✓
SJ030085	46,XX,t(11;17)(q23;q12)[13]/47,idem,+8[5]/46,XX[2]		KMT2A::MLLT6			8p23.3-q24.3	146203	0.617371	100701	146303800		✓
SJ030099	47,XY,+21c[20]	ø				ø
SJ030118	46,XX,t(9;11)(p22;q23)[14]/46,idem,del(X)(q24)[2]/46,XX[4]	t(9;11)(p21.3;q23.3)	KMT2A::MLLT3	driver	✓
SJ030118	46,XX,t(9;11)(p22;q23)[14]/46,idem,del(X)(q24)[2]/46,XX[4]		KMT2A::MLLT3			See Comments						cKTonly	Subclonal finding of del(X)(q24) in cKT not detected by WGS
SJ030119	45,X,-X,t(8;21)(q22;q22)[18]/46,XX[2]	t(8;21)(q21.3;q22.1)	RUNX1::RUNX1T1	driver	✓
SJ030119	45,X,-X,t(8;21)(q22;q22)[18]/46,XX[2]					Xp22.33-q28	152230	-0.965986	2699501	154930300		✓
SJ030120	48,XY,+8,+21[20]	inv(16)(p13.3;q24.3)	CBFA2T3::GLIS2	driver	WGSonly
SJ030120	48,XY,+8,+21[20]		CBFA2T3::GLIS2			21p11.2-q22.3	38708	1.0697	9411201	48119800		✓
SJ030120	48,XY,+8,+21[20]		CBFA2T3::GLIS2			8p23.3-q24.3	146270	1.03556	33501	146303800		✓
SJ030151	47,XX,inv(16)(p13.1q22),+22[13]/46,XX[7]	inv(16)(p13.1;q22)	CBFB::MYH11	driver	✓
SJ030151	47,XX,inv(16)(p13.1q22),+22[13]/46,XX[7]		CBFB::MYH11			22q11.1-q13.33	34386	0.888889	16847901	51234500		✓
SJ030155	50,XX,t(5;9;11)(q13;p22;q23),+19,+21,+21,+21[19]/46,XX[1]	t(5;9;11)(q13.2;p21.3;q23.3)	KMT2A::MLLT3	driver	✓
SJ030155	50,XX,t(5;9;11)(q13;p22;q23),+19,+21,+21,+21[19]/46,XX[1]		KMT2A::MLLT3			19p13.3-q13.43	59029.6	1.11	89201	59118800		✓
SJ030155	50,XX,t(5;9;11)(q13;p22;q23),+19,+21,+21,+21[19]/46,XX[1]		KMT2A::MLLT3			21q11.2-q22.3	33751	3.38918	14368401	48119800		✓
SJ030156	46,XX,-7,+18[14]/46,XX[6]	ø
SJ030156	46,XX,-7,+18[14]/46,XX[6]		Other			18p11.32-q23	77971	1.08508	46101	78017200		✓
SJ030156	46,XX,-7,+18[14]/46,XX[6]		Other			7p22.3-q36.3	159118	-0.979079	10001	159128500		✓
SJ030163	46,XY,t(8;21)(q22;q22)[17]/46,XY[3]	t(8;21)(q21.3;q22.1)	RUNX1::RUNX1T1	driver	✓	ø
SJ030186	46,XX[20]	ø				ø
SJ030195	46,XX,del(5)(q22),t(8;21)(q22;q22)[20]	t(8;21)(q21.3;q22.1)	RUNX1::RUNX1T1	driver	✓
SJ030195	46,XX,del(5)(q22),t(8;21)(q22;q22)[20]					5q21.3-q35.3	74994	-0.987952	105790601	180785400		✓
SJ030200	46,XX,t(11;19)(q23;p13.1)[12]/46,XX[8]	t(11;19)(q23.3;p13.11)	KMT2A::ELL	driver	✓	ø
SJ030208	45,-Y,t(X;21;8)(p22.1;q22;q22)[17]/46,XY[3]	t(X;8;21)(p21.3;q21.3;q22.12)	RUNX1::RUNX1T1	driver	✓
SJ030208	45,-Y,t(X;21;8)(p22.1;q22;q22)[17]/46,XY[3]		RUNX1::RUNX1T1			Yp11.31-q12	26168	-0.998755	2649501	28817600		✓
SJ030231	46,XX,inv(16)(p13.1q22)[18/20]/46,XX[2]	inv(16)(p13.1;q22)	CBFB::MYH11	driver	✓	ø
SJ030233	46,XX,t(15;17)(q22;q21)[19]/46,XX[1]	t(15;17)(q24.1;q21.1)	PML::RARA	driver	✓
SJ030233	46,XX,t(15;17)(q22;q21)[19]/46,XX[1]		PML::RARA			16q12.1-q22.1	19259	-0.782	50124989	69384257		WGSonly	CNV < 20 Mb
SJ030286	46,XY[20]	ø				ø
SJ030287	46,XY,t(15;17)(q24;q21)[15]/46,XY[5]	t(15;17)(q24.1;q21.1)	PML::RARA	driver	✓
SJ030297	46,XY,del(7)(q22)[19]/46,XX[1]	t(3;7)(q26.2;q21.1)	CDK6::MECOM	driver	WGSonly
SJ030297	46,XY,del(7)(q22)[19]/46,XX[1]		CDK6::MECOM			3q26.2-q29	29230	0.994	168717861	197948400		WGSonly	CNV masked by unbalanced translocation, a der(7)t(3;7)(q26;q22)
SJ030297	46,XY,del(7)(q22)[19]/46,XX[1]		CDK6::MECOM			7q21.2-q36.3	66738	-0.886	92389953	159128500		✓
SJ030320	46,XX[20]	ø				ø
SJ030322	46,XY,t(2;17)(q35;q11.2)[20]/46,XY[5]	t(2;17)(q36.3;q11.2)	NF1 truncation	P/LP	✓	ø
SJ030324	47,XX,+8,ins(10;11)(p12;q23q23)[11]/46,XX[9]	t(10;11)(p12.3;q23.3)	KMT2A::MLLT10	driver	✓
SJ030324	47,XX,+8,ins(10;11)(p12;q23q23)[11]/46,XX[9]		KMT2A::MLLT10			8p23.3-q24.3	142676	1.2	100701	146303800		✓
SJ030345	46,XX,del(7)(q22q36)[16]/46,XX[4]	t(3;7)(q26.2;q21.2)	CDK6::MECOM	driver	WGSonly
SJ030345	46,XX,del(7)(q22q36)[16]/46,XX[4]		CDK6::MECOM			3q26.2-q29	29163	1.10227	168785259	197948400		WGSonly	CNV masked by unbalanced translocation, a der(7)t(3;7)(q26;q22)
SJ030345	46,XX,del(7)(q22q36)[16]/46,XX[4]		CDK6::MECOM			7q21.2-q36.3	66674	-0.959091	92454455	159128500		✓
SJ030361	46,XY[20]	t(10;11)(p12.3;q23.3)	KMT2A::MLLT10	driver	WGSonly	ø
SJ030430	46,XY,inv(16)(p13.1q22)[17]/46,XX[3]	inv(16)(p13.1;q22)	CBFB::MYH11	driver	✓	ø
SJ030431	46,XX[16]//46,XY[4]	t(5;14)(q35;q32.2)	See Comment	VUS	WGSonly	ø							no increase in expression of BCL11B or TLX3, case does not cluster with any known AML clusters - no evidence by WTS that this would be a driver
SJ030440	46,XY,add(6)(p25),t(9;11)(p22;q23)[19]/46,XY[1]	t(9;11)(p21.3;q23.3)	KMT2A::MLLT3	driver	✓
SJ030440	46,XY,add(6)(p25),t(9;11)(p22;q23)[19]/46,XY[1]		KMT2A::MLLT3			6p25.3-p22.1	27361	-0.851613	90701	27451800		WGSonly	The deletion of 6p25.3-p22.1 and gain of 8q13.1-q24.3 are suspected to be compatible with the add(6)(p25) in karotype; however, no corresponding softclipped reads observed in WGS analysis which may be due to the technical limitation of short-rerad NGS.
SJ030440	46,XY,add(6)(p25),t(9;11)(p22;q23)[19]/46,XY[1]		KMT2A::MLLT3			8q13.1-q24.3	79158	0.830108	67145701	146303800		WGSonly
SJ030454	46,XX,t(8;21)(q22;q22)[12]/46,XX[8]	t(2;8;21)(p16.1;q21.3;q22.1)	RUNX1::RUNX1T1	driver	✓	ø
SJ030459	46,X,-Y,t(10;11)(p12;q14),i(17)(q10),+19[16]/46,XX[4]	t(10;11)(p12.31;q14.2)	PICALM::MLLT10	driver	✓
SJ030459	46,X,-Y,t(10;11)(p12;q14),i(17)(q10),+19[16]/46,XX[4]		PICALM::MLLT10			19p13.3-q13.43	59029	0.913191	89201	59118800		✓
SJ030459	46,X,-Y,t(10;11)(p12;q14),i(17)(q10),+19[16]/46,XX[4]		PICALM::MLLT10			17p11.2-q25.3	62054.3	0.98	19140801	81195100		✓
SJ030459	46,X,-Y,t(10;11)(p12;q14),i(17)(q10),+19[16]/46,XX[4]		PICALM::MLLT10			17p13.3-p11.2	18928	-0.92	1	18928500		✓
SJ030459	46,X,-Y,t(10;11)(p12;q14),i(17)(q10),+19[16]/46,XX[4]		PICALM::MLLT10			Yp11.31-q12	26168	-0.994363	2649501	28817600		✓
SJ030464	46,XY,t(9;11)(p22;q23)[16]/46,XY[4]	t(9;11)(p21.3;q23.3)	KMT2A::MLLT3	driver	✓	ø
SJ030471	45,X,-X,t(8;21)(q22;q22)[19]/46,XX[1]	t(8;21)(q21.3;q22.1)	RUNX1::RUNX1T1	driver	✓
SJ030471	45,X,-X,t(8;21)(q22;q22)[19]/46,XX[1]					Xp22.33-q28	152230	-1.03424	2699501	154930300		✓
SJ030509	47,XX,+8,t(16;21)(q24;q22)[17]/46,XX[3]	t(16;21)(q24.3;q22.12)	RUNX1::CBFA2T3	driver	✓
SJ030509	47,XX,+8,t(16;21)(q24;q22)[17]/46,XX[3]					8p23.3-q24.3	146270	1.11	33501	146303800		✓
SJ030510	47,XX,+21[6/20]->47,XX,+21[6]/46,XX[14]	ø
SJ030510	47,XX,+21[6/20]->47,XX,+21[6]/46,XX[14]					21q11.2-q22.3	33781	0.349842	14338401	48119800		✓
SJ030534	46,XX,add(11)(q23)[7]	t(11;19)(q23.3;p13.11)	KMT2A::ELL	driver	✓
SJ030547	46,XY,t(7;21)(p15;q22)[19]/46,XY[1]	t(21;7)(q22.12;p15.2)	RUNX1::EVX1	driver	✓
SJ030547	46,XY,t(7;21)(p15;q22)[19]/46,XY[1]					11q14.1-q25	52422	0.960758	82523901	134946400		WGSonly	Masked by unbalanced translocation, a der(7)t(7;11)(q31.1;q14.1) indicated by WGS
SJ030547	46,XY,t(7;21)(p15;q22)[19]/46,XY[1]		RUNX1::EVX1			7q31.1-q36.3	47856	-0.830853	111272401	159128500		WGSonly
SJ030560	45,XY,inv(3)(q21q26.2),-7[20]	inv(3)(q21.3;q26.2)	MECOM	driver	✓
SJ030560	45,XY,inv(3)(q21q26.2),-7[20]					7p22.3-q36.3	159097	-0.965066	30501	159128500		✓
SJ030561	46,XY,inv(16)(p13.1q22)[10]/46,idem,i(22)(q10)[4]/47,idem,+22 [3]/46,XY[3]	inv(16)(p13.1;q22)	CBFB::MYH11	driver	✓
SJ030561	46,XY,inv(16)(p13.1q22)[10]/46,idem,i(22)(q10)[4]/47,idem,+22 [3]/46,XY[3]					22q11.1-q13.33	35179	0.438356	16054601	51234500		✓
SJ030592	46,XX,t(8;21)(q22;q22)[18]/46,XX[2]	t(8;21)(q21.3;q22.1)	RUNX1::RUNX1T1	driver	✓	ø
SJ030601	46,XX,t(8;21)(q22;q22)[6]/45,idem,-X[4]/46,XX[10]	t(8;21)(q21.3;q22.1)	RUNX1::RUNX1T1	driver	✓
SJ030601	46,XX,t(8;21)(q22;q22)[6]/45,idem,-X[4]/46,XX[10]					Xp22.33-q28	152230	-0.528497	2699501	154930300		✓
SJ030612	46,XX,der(9)t(9;16)(p22;q22),der(16)?inv(16)(p13.1q22)t(9;16)(p22;q22)[20]	inv(16)(p13.1;q22)	CBFB::MYH11	driver	✓	ø
SJ030612	46,XX,der(9)t(9;16)(p22;q22),der(16)?inv(16)(p13.1q22)t(9;16)(p22;q22)[20]	t(9;16)(p13.3;p13.11)	no fusion gene	VUS	✓
SJ030624	46,XX,ins(10;11)(p12;q23q23)[12]/46,XX[8]	t(10;11)(p12.3;q23.3)	KMT2A::MLLT10	driver	x/✓	ø							Cryptic KMT2A rearrangement, detected by KMT2A FISH assay.
SJ030669	45,X,-Y,t(8;21)(q22;q22)[16]/46,XY[4]	t(8;21)(q21.3;q22.1)	RUNX1::RUNX1T1	driver	✓
SJ030669	45,X,-Y,t(8;21)(q22;q22)[16]/46,XY[4]					Yp11.31-q12	26168	-1.14593	2649501	28817600		✓
SJ030683	46,XX,inv(16)(p13.1q22)[5]/46,XX[15]	inv(16)(p13.1;q22)	CBFB::MYH11	driver	✓	ø
SJ030689	46,XY,t(9;11)(p22;q23)[9]/46,XY[11]	t(9;11)(p21.3;q23.3)	KMT2A::MLLT3	driver	✓	ø
SJ030690	47,XX,+21[11],46,XX[9]	ø
SJ030690	47,XX,+21[11],46,XX[9]		NPM1mut			21q11.2-q22.3	33781	0.774108	14338401	48119800		✓
SJ030714	46,XX,dup(2)(q11.2q21)[8]/46,XX[12]	ø
SJ030714	46,XX,dup(2)(q11.2q21)[8]/46,XX[12]		moCEBPAmut/LOH			See Comments						cKTonly	Subclonal finding of dup2(q11.2q21) in cKT not detected by WGS
SJ030727	45,XX,-7[20]	ø
SJ030727	45,XX,-7[20]		Other			7p22.3-q36.3	159118	-0.873181	10001	159128500		✓
SJ030778	45,X,-Y[20]	ø
SJ030778	45,X,-Y[20]		KMT2A-PTD			Yp11.31-q11.23	26120	-0.983854	2649501	28770400		✓
SJ030799	46,XY,add(3)(q29),del(5)(q23q34),del(7)(q22q34)[11]/46,XY[9]	t(2;3)(p21;q26.2)	MECOM-rearranged	driver	WGSonly
SJ030799	46,XY,add(3)(q29),del(5)(q23q34),del(7)(q22q34)[11]/46,XY[9]					5q31.1-q33.3	25906	-0.91	130835201	156741200		✓
SJ030799	46,XY,add(3)(q29),del(5)(q23q34),del(7)(q22q34)[11]/46,XY[9]					7q22.1-q34	36186.2	-0.85	103573742	139759936		✓
SJ030852	46,XY,t(8;16)(p11.2;p13.3)[17]/46,XY[3]	t(8;16)(p11.21;p13.3)	KAT6A::CREBBP	driver	✓	ø
SJ030881	46,X,-X,+8,t(8;21)(q22;q22)[19]/46,XX[1]	t(8;21)(q21.3;q22.1)	RUNX1::RUNX1T1	driver	✓
SJ030881	46,X,-X,+8,t(8;21)(q22;q22)[19]/46,XX[1]		RUNX1::RUNX1T1			8p23.3-q24.3	146203	1.11722	100701	146303800		✓
SJ030881	46,X,-X,+8,t(8;21)(q22;q22)[19]/46,XX[1]		RUNX1::RUNX1T1			Xp22.33-q28	149411	-0.978292	2699501	152111414		✓
SJ030934	46,XY[20]	ø				ø
SJ030947	47,XY,+8[17]/46,XY[3]	ø
SJ030947	47,XY,+8[17]/46,XY[3]		BCOR/STAG2/SRSF2			8p23.3-q24.3	146270	1.08824	33501	146303800		✓
SJ030987	46,XX,ins(10;11)(p12;q23q23)[12]/46,XX[8]	t(10;11)(p12.3;q23.3)	KMT2A::MLLT10	driver	x/✓	ø							Cryptic KMT2A rearrangement, detected by KMT2A FISH assay.
SJ030988	46,XY,t(10;11)(p12;q21)[6],46,XY[1]	t(10;11)(p12.31;q14.2)	PICALM::MLLT10	driver	✓	ø
SJ031022	46,XX,t(8;21)(q22;q22)[20]	t(8;21)(q21.3;q22.1)	RUNX1::RUNX1T1	driver	✓	ø
SJ031051	46,XY,t(11;17)(q23;q12)[20]	t(11;17)(q23;q12)	KMT2A::MLLT6	driver	✓	ø
SJ031075	48,XY,+8,+21c[13]/46,XY[7]	ø
SJ031075	48,XY,+8,+21c[13]/46,XY[7]		Down syndrome w/ GATA1mut			8p23.3-q24.3	146203	1.06947	100701	146303800		✓
SJ031082	47,XX,+10,t(16;21)(p11.2;q22.3)[17]/46,XX[3]	t(16;21)(p11.2;q22.2)	FUS::ERG	driver	✓
SJ031082	47,XX,+10,t(16;21)(p11.2;q22.3)[17]/46,XX[3]		FUS::ERG			10p15.3-q26.3	135452	0.932	71701	135524700		✓
SJ031082	47,XX,+10,t(16;21)(p11.2;q22.3)[17]/46,XX[3]		FUS::ERG			8q12.2-q24.3	84369	0.356	61934748	146303800		✓	Karyotype had one metaphase with a der(17)t(8;17)(q21;p13), which is consistent with the sub-clonal finding of an unbalanced t(8q;17p) by CIRCOS plot.
SJ031106	47,XX,+8[2]/46,XX[18]	ø
SJ031106	47,XX,+8[2]/46,XX[18]					See Comments						cKTonly	Subclonal finding of trisomy 8 in cKT not detected by WGS
SJ031120	46,XY,t(9;11)(p22;q23)[8]/47,idem,+19[5]/47,idem,+8[4]/48,idem,+8,+10[3]	t(9;11)(p21.3;q23.3)	KMT2A::MLLT3	driver	✓
SJ031120	46,XY,t(9;11)(p22;q23)[8]/47,idem,+19[5]/47,idem,+8[4]/48,idem,+8,+10[3]		KMT2A::MLLT3			8p23.3-q24.3	146270	0.144608	33501	146303800		cKTonly	subclonal gain of 8p23.3-q24.3 observed by WGS but below diagnostic cut-off
SJ031120	46,XY,t(9;11)(p22;q23)[8]/47,idem,+19[5]/47,idem,+8[4]/48,idem,+8,+10[3]		KMT2A::MLLT3			19p13.3-q13.43	59029	0.367647	89201	59118800		✓
SJ031120	46,XY,t(9;11)(p22;q23)[8]/47,idem,+19[5]/47,idem,+8[4]/48,idem,+8,+10[3]					See Comments						cKTonly	Subclonal finding of trisomy 10 in cKT not detected by WGS
SJ031121	46,XY[20]	t(X;6)(p11.23;q23.3)	MYB::GATA1	driver	WGSonly	ø
SJ031186	46,XY,t(8;21)(q22;q22),del(9)(q13q22)[20]	t(8;21)(q21.3;q22.1)	RUNX1::RUNX1T1	driver	✓
SJ031186	46,XY,t(8;21)(q22;q22),del(9)(q13q22)[20]					9q13-q31.1	37551	-0.852356	67684501	105236100		✓
SJ031188	46,XY,t(8;21)(q22;q22)[6]/45,idem,-Y[14]	t(8;21)(q21.3;q22.1)	RUNX1::RUNX1T1	driver	✓
SJ031188	46,XY,t(8;21)(q22;q22)[6]/45,idem,-Y[14]					Yp11.31-q12	26168	-0.54878	2649501	28817600		✓
SJ031200	46,XX,t(8;21)(q22;q22)[14]/46,XX[6]	t(8;21)(q21.3;q22.1)	RUNX1::RUNX1T1	driver	✓	ø
SJ031206	45,XY,-7[8]/46,XY[12]	t(1;11)(p36.32;q24.1)	HSPA8::PRDM16	driver	WGSonly
SJ031206	45,XY,-7[8]/46,XY[12]					7p22.3-q36.3	159118	-0.984848	10001	159128500		✓
SJ031249	46,XY,t(9;11)(p22;q23)[20]	t(9;11)(p21.3;q23.3)	KMT2A::MLLT3	driver	✓	ø
SJ031259	46,XY,der(16)inv(16)(p13.1q22)t(16;21)(q22;q22.3),der(21)t(16;21)(q22;q22.3)[14]/46,idem,t(4;9)(q12;q33)[4]/46,XY[2]	inv(16)(p13.1;q22)	CBFB::MYH11	driver	✓	ø
SJ031259	46,XY,der(16)inv(16)(p13.1q22)t(16;21)(q22;q22.3),der(21)t(16;21)(q22;q22.3)[14]/46,idem,t(4;9)(q12;q33)[4]/46,XY[2]	t(4;9)(q12;q33.2)	CNTRL::KIT	P/LP, targetable	✓
SJ031259	46,XY,der(16)inv(16)(p13.1q22)t(16;21)(q22;q22.3),der(21)t(16;21)(q22;q22.3)[14]/46,idem,t(4;9)(q12;q33)[4]/46,XY[2]	t(16;21)(q22;q22.3)		VUS	✓
SJ031272	46,XY[20]	ø				ø
SJ031300	48,XY,+8,t(10;11)(p12;q23),+21[19]/46,XY[1]	t(10;11)(p12.3;q23.3)	KMT2A::MLLT10	driver	✓
SJ031300	48,XY,+8,t(10;11)(p12;q23),+21[19]/46,XY[1]		KMT2A::MLLT10			21q11.2-q22.3	33750	1.07133	14369501	48119800		✓
SJ031300	48,XY,+8,t(10;11)(p12;q23),+21[19]/46,XY[1]					8p23.3-q24.3	146270	1.07	33501	146303800		✓
SJ031302	46,XX,t(16;16)(p13.1;q22)[18]/46,XX[2]	inv(16)(p13.1;q22)	CBFB::MYH11	driver	✓	ø
SJ031311	46,XX,ins(10;11)(p12;q23q22)[20]	t(10;11)(p12.3;q23.3)	KMT2A::MLLT10	driver	✓
SJ031311	46,XX,ins(10;11)(p12;q23q22)[20]		KMT2A::MLLT10			11q14.3-q22.3	15921	-1.02146	92265195	108186808		WGSonly	CNV masked by unbalanced chromosomal translocation
SJ031312	46,XX[20]	ø				ø
SJ031336	46,XX,der(6)(6pter->6q13::8q22->8q23::21q22->21q22::8q22->8qter),der(8)(8pter->8q13::6q13->6qter),add(21)(q22.3)[17] 46,XX[3]	t(8;21)(q21.3;q22.1)	RUNX1::RUNX1T1	driver	x/✓	ø
SJ031336	46,XX,der(6)(6pter->6q13::8q22->8q23::21q22->21q22::8q22->8qter),der(8)(8pter->8q13::6q13->6qter),add(21)(q22.3)[17] 46,XX[3]	t(6;8)(q14.1;q21.3)		VUS	✓
SJ031343	46,XY,t(5;12;15)(q31;q24.1;q15)[9]/46,XY[11]	t(5;12;15)(q31.1;24.31;q14)	no fusion protein	VUS	✓	ø
SJ031399	46,XX,t(6;11)(q27;q23)[20]	t(6;11)(q27;q23.3)	KMT2A::MLLT4	driver	✓	ø
SJ031409	46,XX,t(7;21)(p15;q22),add(20)(q13.2)[20]	cplx but balanced translocation involvig 7p, 20q and 21q22	RUNX1::CBFA2T2	driver	WGSonly	ø							FISH showed 3 signals of RUNX1, but no metaphase FISH. K detected part of the complex chr translocation but the essential t(20;21) was missed by cyto
SJ031417	47,XX,+8,t(11;19)(q23;p13.3)[14]/47,X,t(X;8)(p22.3;p21),+8,t(11;19)(q23;p13.3)[6]	t(11;19)(q23.3;p13.13)	KMT2A::MLLT1	driver	✓
SJ031417	47,XX,+8,t(11;19)(q23;p13.3)[14]/47,X,t(X;8)(p22.3;p21),+8,t(11;19)(q23;p13.3)[6]	t(X;8)(p22.12;p11.21)		VUS, secondary	✓
SJ031417	47,XX,+8,t(11;19)(q23;p13.3)[14]/47,X,t(X;8)(p22.3;p21),+8,t(11;19)(q23;p13.3)[6]					8p23.3-q24.3	146270	1.30809	33501	146303800		✓
SJ031434	46,XY,add(16)(p13.3),del(16)(q23)[20]	t(5;11)(q35.3;p15.4)	NUP98::NSD1	driver	WGSonly
SJ031434	46,XY,add(16)(p13.3),del(16)(q23)[20]	t(16;16)(p13.2;q21)		VUS	x/✓								WGS indicated a tranlocation betweem 16p and 16q, which may be interpreated as add(16)(p13.3) and del(16)(q23) in karyotype.
SJ031469	46,XX,t(8;21)(q22;q22)[20]	t(8;21)(q21.3;q22.1)	RUNX1::RUNX1T1	driver	✓	ø
SJ031477	47,XX,del(20)(q12),+21c[11]/46,XX[9]	ø				ø
SJ031527	47,XY,+21c,add(21)(q22.3)[13]/47,XY,+21c[7]	ø
SJ031527	47,XY,+21c,add(21)(q22.3)[13]/47,XY,+21c[7]		Down syndrome w/ GATA1mut			22q12.2-q13.33	20504	0.952727	30729938	51234500		x/✓	The add(21)(q22.3) observed in cKT was further defined by WGS as der(21)t(21;22)(q22.3;q12.2). Supplementary Figure S12 A.
SJ031528	46,XX,t(11;19)(q23;p13.1)[13]/46,XX[7]	t(11;19)(q23.3;p13.11)	KMT2A::ELL	driver	✓	ø
SJ031554	46,XX,t(11;19)(q23;p13.1)[20]	t(11;19)(q23.3;p13.11)	KMT2A::ELL	driver	✓	ø
SJ031579	45,XX,-7[17]/46,XX[3]	ø
SJ031579	45,XX,-7[17]/46,XX[3]		EZH2			7p22.3-q36.3	120735	-0.65	10001	159128500		✓
SJ031601	46,XY,del(7)(q11.1),t(8;21)(q22;q22)[12]/46,XY[1]	t(8;21)(q21.3;q22.1)	RUNX1::RUNX1T1	driver	✓
SJ031601	46,XY,del(7)(q11.1),t(8;21)(q22;q22)[12]/46,XY[1]		RUNX1::RUNX1T1			7p22.3-p11.2	54904	-0.998909	10001	54914073		x/✓	The del(7)(q11.1) observed in cKT was further defined by WGS as der(7)del(7)(p11.2)del(7)(q31.1). Supplementary Figure S12 B.
SJ031601	46,XY,del(7)(q11.1),t(8;21)(q22;q22)[12]/46,XY[1]		RUNX1::RUNX1T1			7q31.1-q36.3	47961	-0.994547	111167225	159128500		x/✓
SJ031606	45,XX,del(6)(q13),-7[14]/46,XX[6]	t(19;21)(q13.2;q22.12)	RUNX1::POU2F2	driver	WGSonly
SJ031606	45,XX,del(6)(q13),-7[14]/46,XX[6]		RUNX1::POU2F2			21q22.12-q22.3	11247	1.05013	36872001	48119800		WGSonly	CNV < 20 Mb
SJ031606	45,XX,del(6)(q13),-7[14]/46,XX[6]		RUNX1::POU2F2			7p22.3-q36.3	159118	-0.992084	10001	159128500		✓
SJ031606	45,XX,del(6)(q13),-7[14]/46,XX[6]		RUNX1::POU2F2			6q14.1-q27	94230	-1.00528	76820801	171050900		✓
SJ031686	47,XX,?t(4;4)(q33;q35),+8,t(16;21)(q24.3;q22.12)[20]	t(16;21)(q24.3;q22.12)	RUNX1::CBFA2T3	driver	✓
SJ031686	47,XX,?t(4;4)(q33;q35),+8,t(16;21)(q24.3;q22.12)[20]				X								The questionable t(4;4)(q33;q35) cannot be further clarified.
SJ031686	47,XX,?t(4;4)(q33;q35),+8,t(16;21)(q24.3;q22.12)[20]		RUNX1::CBFA2T3			4q34.2-q35.2	14648	-0.549601	176395301	191043900		WGSonly	CNV < 20 Mb
SJ031686	47,XX,?t(4;4)(q33;q35),+8,t(16;21)(q24.3;q22.12)[20]		RUNX1::CBFA2T3			8p23.3-q24.3	146203	1.0171	100701	146303800		✓
SJ031686	47,XX,?t(4;4)(q33;q35),+8,t(16;21)(q24.3;q22.12)[20]		RUNX1::CBFA2T3			13q21.1-q34	55992.9	0.62	59116883	115109800		WGSonly	Masked by unbalanced translocation, a der(7)t(7;13)(q33;q21.1) by WGS
SJ031686	47,XX,?t(4;4)(q33;q35),+8,t(16;21)(q24.3;q22.12)[20]		RUNX1::CBFA2T3			7q33-q36.3	23461	-0.27138	135667206	159128500		WGSonly
SJ031719	46,XX,t(3;3)(p24;q26.2),-16,+mar[13]/46,idem,del(11)(q21q23)[3]	t(3;3)(p24.2;q26.32)	TBL1XR1::RARB	driver	✓
SJ031719	46,XX,t(3;3)(p24;q26.2),-16,+mar[13]/46,idem,del(11)(q21q23)[3]		TBL1XR1::RARB			11q14.1q23.1	25709	-0.42	85173777	110882819		✓
SJ031719	46,XX,t(3;3)(p24;q26.2),-16,+mar[13]/46,idem,del(11)(q21q23)[3]		TBL1XR1::RARB			16p13.3-p13.2	8465	-0.879121	60001	8525646		x/✓	WGS detected deletions in both p and q arms of chr 16, suggesting the marker chromosome in cKT was derived from chr 16. Supplementary Figure S12 C.
SJ031719	46,XX,t(3;3)(p24;q26.2),-16,+mar[13]/46,idem,del(11)(q21q23)[3]		TBL1XR1::RARB			16q12.2-q24.3	34097	-0.862027	56195148	90292700		x/✓
SJ031719	46,XX,t(3;3)(p24;q26.2),-16,+mar[13]/46,idem,del(11)(q21q23)[3]		TBL1XR1::RARB			3p26.3-p24.2	25408	0.901099	60201	25468863		x/✓	Apparently balaned t(3;3)(p24;q26.2) in cKT; however, WGS revealed cryptic gain of 3p26.3-p24.2 and loss of 3q26.32-q29 associated with the translocation. Supplementary Figure S12 C.
SJ031719	46,XX,t(3;3)(p24;q26.2),-16,+mar[13]/46,idem,del(11)(q21q23)[3]		TBL1XR1::RARB			3q26.32-q29	21148	-0.849817	176769010	197917300		x/✓
SJ031760	45,X,-Y,t(8;21)(q22;q22)[9]/46,X,-Y,t(8;21)(q22;q22),+15[10]/46,XY[1]	t(8;21)(q21.3;q22.1)	RUNX1::RUNX1T1	driver	✓
SJ031760	45,X,-Y,t(8;21)(q22;q22)[9]/46,X,-Y,t(8;21)(q22;q22),+15[10]/46,XY[1]		RUNX1::RUNX1T1			Yp11.31-q11.23	26130	-0.992529	2649501	28779800		✓
SJ031760	45,X,-Y,t(8;21)(q22;q22)[9]/46,X,-Y,t(8;21)(q22;q22),+15[10]/46,XY[1]		RUNX1::RUNX1T1			15q11.1-q26.3	82521	0.204909	20000001	102521200		cKTonly	subclonal gain of 15q11.1-q26.3 observed by WGS but below diagnostic cut-off
SJ031769	47,XY,+6[19]/46,XY[1]	ø
SJ031769	47,XY,+6[19]/46,XY[1]		CBFB-Like			6p25.3-q27	170960	1.09305	90701	171050900		✓
SJ031781	45,XX,inv(3)(q21q26.2),-7[20]	inv(3)(q21.3;q26.2)	MECOM	driver	✓
SJ031781	45,XX,inv(3)(q21q26.2),-7[20]		MECOM			7p22.3-q36.3	38281	-0.986094	10001	159128500		✓
SJ031855	46,XX,inv(16)(p13.1q22)[12]/47,idem,+22[6]/46,XX[2]	inv(16)(p13.1;q22)	CBFB::MYH11	driver	✓
SJ031855	46,XX,inv(16)(p13.1q22)[12]/47,idem,+22[6]/46,XX[2]		CBFB::MYH11			22q11.1-q13.33	34386	0.628849	16847901	51234500		✓
SJ031924	46,XX,t(6;9)(p22;q34)[17]/46,XX[3]	t(6;9)(p22.3;q34.13)	DEK::NUP214	driver	✓	ø
SJ032017	46,XX,t(1;11)(q21;q23)[19]	t(1;11)(q21.3;q23.3)	KMT2A::MLLT11	driver	✓	ø
SJ032027	46,XX[24]	ø				ø
SJ032052	46,XY[20]	ø				ø
SJ032070	46,XY[25]	ø				ø
SJ032106	46,XY[20]	ø				ø
SJ032127	46,XY[21]	ø				ø
SJ032148	46,XX,t(8;21)(q22;q22)[20]	t(8;21)(q21.3;q22.1)	RUNX1::RUNX1T1	driver	✓	ø
SJ032172	46,XY[7]	ø				ø
SJ032178	47,XX,+10[8]/48,idem,+8[3]/49,idem,+4,+8[3]/46,XX[11]	ø
SJ032178	47,XX,+10[8]/48,idem,+8[3]/49,idem,+4,+8[3]/46,XX[11]		moCEBPAmut/monoallelic expression			10p15.3-q26.3	135452	1.04317	71701	135524700		✓
SJ032178	47,XX,+10[8]/48,idem,+8[3]/49,idem,+4,+8[3]/46,XX[11]		moCEBPAmut/monoallelic expression			4p16.3-q35.2	191033	0.338129	10501	191043900		✓
SJ032178	47,XX,+10[8]/48,idem,+8[3]/49,idem,+4,+8[3]/46,XX[11]		moCEBPAmut/monoallelic expression			8p23.3-q24.3	146270	0.165468	33501	146303800		cKTonly	subclonal gain of 8p23.3-q24.3 observed by WGS but below diagnostic cut-off
SJ032187	46,XY,t(4;8;21)(q21;q22;q22)[17]/46,idem,der(4)add(4)(p16)t(4;8;21)[4]/~4Nunbanded[2]/46,XY[2]	t(4;8;21)(q24;q21.3;q22.1)	RUNX1::RUNX1T1	driver	✓
SJ032187	46,XY,t(4;8;21)(q21;q22;q22)[17]/46,idem,der(4)add(4)(p16)t(4;8;21)[4]/~4Nunbanded[2]/46,XY[2]		RUNX1::RUNX1T1			9q13-q21.33	19854	-0.996556	68148701	88003200		WGSonly	CNV < 20 Mb
SJ032233	47,XX,inv(16)(p13.1q22),+22[11]/46,XX[9]	inv(16)(p13.1;q22)	CBFB::MYH11	driver	✓
SJ032233	47,XX,inv(16)(p13.1q22),+22[11]/46,XX[9]		CBFB::MYH11			22q11.1-q13.33	34386	0.878378	16847901	51234500		✓
SJ032253	46,XY[20]	inv(16)(p13.1;q22)	CBFB::MYH11	driver	WGSonly	ø
SJ032319	46,XX[20]	ø				ø
SJ032324	46,XX,t(8;21)(q22;q22)[20]	t(8;21)(q21.3;q22.1)	RUNX1::RUNX1T1	driver	✓	ø
SJ032325	46,XX[20]	ø				ø
SJ032347	46,XY[20]	ø				ø
SJ032355	46,XX[20]	ø				ø
SJ032364	48,XX,t(2;11)(q21;q22),+6,+7[11]/48,idem,-7,add(12)(p13),+22[4]/46,XX[5]	t(2;21)(q22.3;q22.12)	RUNX1::ZEB2	driver	WGSonly
SJ032364	48,XX,t(2;11)(q21;q22),+6,+7[11]/48,idem,-7,add(12)(p13),+22[4]/46,XX[5]	t(2;11)(q22.3;q22.3)		VUS	✓
SJ032364	48,XX,t(2;11)(q21;q22),+6,+7[11]/48,idem,-7,add(12)(p13),+22[4]/46,XX[5]		RUNX1::ZEB2			1q25.3-q44	68714	0.877506	180526011	249240500		x/✓	The add(12)(p13) observed in cKT was further defined by WGS as der(12)t(1;12)(p13.3;q25.3). Supplementary Figure S12 D.
SJ032364	48,XX,t(2;11)(q21;q22),+6,+7[11]/48,idem,-7,add(12)(p13),+22[4]/46,XX[5]		RUNX1::ZEB2			22q11.1-q13.33	34386	0.935412	16847901	51234500		✓
SJ032364	48,XX,t(2;11)(q21;q22),+6,+7[11]/48,idem,-7,add(12)(p13),+22[4]/46,XX[5]		RUNX1::ZEB2			6p25.3-q27	170960	1.46548	90701	171050900		✓
SJ032364	48,XX,t(2;11)(q21;q22),+6,+7[11]/48,idem,-7,add(12)(p13),+22[4]/46,XX[5]		RUNX1::ZEB2			7p22.3-q36.3	159118	0.552339	10001	159128500		✓
SJ032377	46,XY[20]	t(7;21)(p22.1;q22.12)	RUNX1::USP42	driver	WGSonly
SJ032378	46,XY[20]	ø				ø
SJ032403	45,X,-Y,t(8;21)(q22;q22)[12]/45,idem,del(7)(q31q34)[8]	t(8;21)(q21.3;q22.1)	RUNX1::RUNX1T1	driver	✓
SJ032403	45,X,-Y,t(8;21)(q22;q22)[12]/45,idem,del(7)(q31q34)[8]		RUNX1::RUNX1T1			7q31-q36	50126	-0.416501	108998496	159124447		✓
SJ032403	45,X,-Y,t(8;21)(q22;q22)[12]/45,idem,del(7)(q31q34)[8]		RUNX1::RUNX1T1			Yp11.31-q12	26168	-1.05047	2649501	28817600		✓
SJ032419	46,XY[20]	ø				ø
SJ032424	46,XX[20]	ø				ø
SJ032429	46,XY[20]	ø				ø
SJ032440	46,XY[20]	ø				ø
SJ032453	46,XX,der(11)?t(9;11)(p22;q23),del(12)(p12),inv(16)(p13.3q23)[23]/46,XX[2]	t(9;11)(p21.3;q23.3)	KMT2A::MLLT3	driver	✓
SJ032453	46,XX,der(11)?t(9;11)(p22;q23),del(12)(p12),inv(16)(p13.3q23)[23]/46,XX[2]	inv(16)(p13.3;q22.1)		VUS	✓
SJ032453	46,XX,der(11)?t(9;11)(p22;q23),del(12)(p12),inv(16)(p13.3q23)[23]/46,XX[2]		KMT2A::MLLT3			12p13.33-p11.1	33777.1	-0.74	1074562	34851700		✓
SJ032480	46,XX,t(10;11)(p12;q23)[20]	t(10;11)(p12.3;q23.3)	KMT2A::MLLT10	driver	✓	ø
SJ032526	47,XY,+mar[20]	ø
SJ032526	47,XY,+mar[20]		Other			8p23.3-q24.3	140179	1.47	100701	140279900		x/✓	WGS finding suggested that the marker chromosome was derived from chr 8. Supplementary Figure S12 E.
SJ032598	46,XY,t(8;21)(q22;q22)[11]/45,idem,-Y[5]/46,XY[4]	t(8;21)(q21.3;q22.1)	RUNX1::RUNX1T1	driver	✓
SJ032598	46,XY,t(8;21)(q22;q22)[11]/45,idem,-Y[5]/46,XY[4]		RUNX1::RUNX1T1			Yp11.31-q12	26168	-0.491754	2649501	28817600		✓
SJ032692	46,XX,del(7)(q22q32)[17]/47,idem,+9[3]	t(3;7)(q26.2;q21.2)	CDK6::MECOM	driver	WGSonly
SJ032692	46,XX,del(7)(q22q32)[17]/47,idem,+9[3]		CDK6::MECOM			See Comments						cKTonly	Subclonal finding of trisomy 8 in cKT not detected by WGS
SJ032692	46,XX,del(7)(q22q32)[17]/47,idem,+9[3]		CDK6::MECOM			7q21.2-q36.3	66677	-0.997416	92451026	159128500		✓
SJ032692	46,XX,del(7)(q22q32)[17]/47,idem,+9[3]		CDK6::MECOM			3q26.2-q29	29181	1.05943	168767393	197948400		WGSonly	CNV masked by unbalanced translocation, a der(7)t(3;7)(q26;q22)

## Sheet: S6B - Complex Karyotype
Supplemenetary Table S6B. Nine cases with complex karyotype and one case with near-tetraploid genome and karyotypic heterogeneity.
SampleID	Karyotype	AML (potential) driver identified by iWGS-WTS	Comment
SJ030410	46,XY,del(1)(p35),add(5)(q32),r(7)(p14q11.2),del(9)(q13q22),add(11)(q13)[13]/46,XY[7]	CDK6::HOXA13	LS-CNV see Table S4, comparison for driver detection see Table S5.
SJ031359	48,XX,+2,?del(5)(q31q35),del(6)(q13),add(7)(p22),+mar[7]/46,XX[13]	KMT2A::ELL	The KMT2A rearrangement was not detected by karyotyping analysis. See Supplementary Figure S6C, CIRCOS plot for the integreated visualizatin of genome-wide SVs and CNVs dtected by WGS.
SJ031736	46,XY,t(2;12)(q?23;p13),t(7;8)(p15;p23),t(7;13)(q?36;q14)[12]/46,idem,del(3)(q21) [3]/48,idem,+6,+21[2]/46,XY[3]	NUP98::KDM5A	LS-CNV see Table S4, comparison for driver detection see Table S5.
SJ030209	46,XY,add(1)(p13),?t(3;22)(p21;q13),?ins(5;1)(p15;p34p13)[15]/46,XY[5]	RBM15::MRTFA	The t(1;22)(p13;q13)/RBM15::MRTFA was not detected by karyotyping. See Supplementary Figure S11A, CIRCOS plot for the integreated visualizatin of genome-wide SVs and CNVs dtected by WGS.
SJ030416	45,XY,+4,dic(9;17)(p11;p11.2),t(10;14)(q23;q32),del(12)(p11.2),-13[19]/46,XY[1]	TP53, biallelic LOF	LS-CNV see Table S4, comparison for driver detection see Table S5.
SJ030708	43,XY,-5,iAMP11q,add(12)(p11.2),-17,-18[11]/44,idem,+mar[3]/ 58,XY,+4,+6,+8,+9,+10,iAMP11q,+12,add(12)(p11.2),+13,+15,+19,+20,+20,+22[3]/46,XY[3]	TP53, biallelic LOF	LS-CNV see Table S4, comparison for driver detection see Table S5.
SJ030773	49,XX,ins(1;?)(p13;?),del(1)(p13p22),add(4)(q31),+8,add(10)(q22),+20,+21[10]/49,XX,add(1)(p12),ins(4;?)(q12;?),+8,del(8)(q13q22),+20,+21[10]	TEC::MLLT10	LS-CNV see Table S4, comparison for driver detection see Table S5.
SJ032201	45,XX,der(6)t(6;21)(q13;q22),ins(11;5)(p15;q13q33),del(7)(q22),dic(17;21)(p13;p11.2),-21,+der(?)t(12;?)(p13;?)[42]/44,idem,-7,der(18)(18pter->18q23::?::7q22->7qter)[11]/46,XX[5]	TP53, biallelic LOF	LS-CNV see Table S4, comparison for driver detection see Table S5.
SJ032210	46,XY,del(5)(q22q33),t(6;13)(q25;q12),?inv(10)(q22q26)[13]/46,XY[7]	NPM1 mutation	A possible inv(10)(q22q26) was intepreted in karyotype analysis. WGS refines this chromosomal abnormality as t(6;10)(q21;q22.3) which was verified by SKY (spectral karyotyping). The iWGS-WTS analysis further demonstrated that the chromosome translocation did not result in an oncogenic gene fusion, nor disrupt a tumor suppressor gene. See Supplementary Figure S11B for more details.
SJ030153	96,XXYY,-7,+8,-9,del(9)(p22)x2,+14,+18,+19,+20,+22[cp12][12]/46,XY[8]	Unknown	Karyotype analysis showed near-tetraploid genome and karyotypic heterogeneity. See Supplementary Figure S8A, CIRCOS plot for the integreated visualizatin of genome-wide SVs and CNVs dtected by WGS.

## Sheet: S7A - GR Gene List
Supplementary Table S7a. Germline Reportable Gene List: 220 genes predisposing to cancer and/or bone marrow failure (BMF) that were clinically validated for germline molecular diagnosis at SJCRH.
ACD	CEBPA	FANCB	KRAS	NOP10	RECQL4	RRAS	TAFAZZIN
ACTN1	CHEK2	FANCC	LAMTOR2	NPM1	REST	RRAS2	TCIRG1
ADA2	CLPB	FANCD2	LIG4	NRAS	RET	RTEL1	TERC
AIP	CSF3R	FANCE	LYST	NTHL1	RIT1	RUNX1	TERT
AK2	CTC1	FANCF	LZTR1	NYNRIN	RMRP	SAMD9	THPO
ALK	CTLA4	FANCG	MAD2L2	PALB2	RPL11	SAMD9L	TINF2
AMER1	CTNNA1	FANCI	MAP2K1	PARN	RPL15	SBDS	TMEM127
ANKRD26	CTR9	FANCL	MAP2K2	PAX5	RPL18	SDHA	TP53
AP3B1	CXCR4	FANCM	MAX	PDGFRA	RPL26	SDHAF2	TRIM28
APC	CYCS	FBXW7	MDM4	PHOX2B	RPL27	SDHB	TRIM37
ATM	DDX41	FH	MECOM	PMS2	RPL3	SDHC	TSC1
AXIN2	DHX34	FLCN	MEN1	POLD1	RPL31	SDHD	TSC2
BAP1	DICER1	FLI1	MET	POLE	RPL35	SH2D1A	TSR2
BARD1	DIS3L2	G6PC3	MITF	POT1	RPL35A	SHOC2	TUBB1
BLM	DKC1	GATA1	MLH1	PPP1CB	RPL5	SLC37A4	UBE2T
BMPR1A	DNAJC21	GATA2	MPL	PRF1	RPL9	SLX4	USB1
BRAF	DNMT3A	GFI1	MRAS	PRKAR1A	RPLP0	SMAD4	VHL
BRCA1	EFL1	GPR161	MSH2	PTCH1	RPS10	SMARCA4	VPS13B
BRCA2	ELANE	GREM1	MSH3	PTCH2	RPS15A	SMARCB1	VPS45
BRIP1	ELP1	HAX1	MSH6	PTEN	RPS17	SMARCE1	WAS
BUB1B	EPCAM	HLTF	MUTYH	PTPN11	RPS19	SOS1	WRAP53
CBL	EPO	HOXA11	MYH9	RAB27A	RPS20	SOS2	WT1
CDC73	ERCC4	HRAS	MYSM1	RAD51	RPS24	SPRED1	XRCC2
CDH1	ERCC6L2	IKZF1	NAF1	RAD51C	RPS26	SRP54	ZFPM1
CDK4	ETV6	IKZF5	NBN	RAD51D	RPS27	SRP72
CDKN1B	EXT1	JAGN1	NF1	RAF1	RPS28	STAT3
CDKN1C	EXT2	KIF1B	NF2	RB1	RPS29	STK11
CDKN2A	FANCA	KIT	NHP2	RBM8A	RPS7	SUFU

[truncated: 1 more sheets: S7B - Germline Variants]
